# Supplementary material
Source: publisher figshare collection journal article supplement (https://acs.figshare.com/ndownloader/files/5062201)
Supplement: Supplementary file 1 [file 5062201]

  
data_03302 
  
_audit_creation_method            SHELXL-97 
_chemical_name_systematic 
; 
 ? 
; 
_chemical_name_common             ? 
_chemical_melting_point           ? 
_chemical_formula_moiety          ? 
_chemical_formula_sum 
 'C42 H54 F5 Mo N3 S' 
_chemical_formula_weight          823.88 
  
loop_ 
 _atom_type_symbol 
 _atom_type_description 
 _atom_type_scat_dispersion_real 
 _atom_type_scat_dispersion_imag 
 _atom_type_scat_source 
 'C'  'C'   0.0033   0.0016 
 'International Tables Vol C Tables 4.2.6.8 and 6.1.1.4' 
 'H'  'H'   0.0000   0.0000 
 'International Tables Vol C Tables 4.2.6.8 and 6.1.1.4' 
 'N'  'N'   0.0061   0.0033 
 'International Tables Vol C Tables 4.2.6.8 and 6.1.1.4' 
 'F'  'F'   0.0171   0.0103 
 'International Tables Vol C Tables 4.2.6.8 and 6.1.1.4' 
 'S'  'S'   0.1246   0.1234 
 'International Tables Vol C Tables 4.2.6.8 and 6.1.1.4' 
 'Mo'  'Mo'  -1.6832   0.6857 
 'International Tables Vol C Tables 4.2.6.8 and 6.1.1.4' 
  
_symmetry_cell_setting            Monoclinic 
_symmetry_space_group_name_H-M    P2(1)/c 
  
loop_ 
 _symmetry_equiv_pos_as_xyz 
 'x, y, z' 
 '-x, y+1/2, -z+1/2' 
 '-x, -y, -z' 
 'x, -y-1/2, z-1/2' 
  
_cell_length_a                    11.0092(6) 
_cell_length_b                    18.7121(11) 
_cell_length_c                    20.1675(11) 
_cell_angle_alpha                 90.00 
_cell_angle_beta                  105.5280(10) 
_cell_angle_gamma                 90.00 
_cell_volume                      4003.0(4) 
_cell_formula_units_Z             4 
_cell_measurement_temperature     193(2) 
_cell_measurement_reflns_used     8468 
_cell_measurement_theta_min       2.21 
_cell_measurement_theta_max       28.24 
  
_exptl_crystal_description        block 
_exptl_crystal_colour             purple 
_exptl_crystal_size_max           0.30 
_exptl_crystal_size_mid           0.25 
_exptl_crystal_size_min           0.25 
_exptl_crystal_density_meas       'not measured' 
_exptl_crystal_density_diffrn     1.367 
_exptl_crystal_density_method     'not measured' 
_exptl_crystal_F_000              1720 
_exptl_absorpt_coefficient_mu     0.436 
_exptl_absorpt_correction_type    multi-scan 
_exptl_absorpt_correction_T_min   0.8766 
_exptl_absorpt_correction_T_max   0.8950 
_exptl_absorpt_process_details    sadabs 
  
_exptl_special_details 
; 
 'Siemens three-circle diffractometer, Bruker CCD' 
; 
  
_diffrn_ambient_temperature       193(2) 
_diffrn_radiation_wavelength      0.71073 
_diffrn_radiation_type            MoK\a 
_diffrn_radiation_source          'fine-focus sealed tube' 
_diffrn_radiation_monochromator   graphite 
_diffrn_measurement_device_type   'Bruker Smart CCD' 
_diffrn_measurement_method        'omega scans' 
_diffrn_detector_area_resol_mean  ? 
_diffrn_standards_number          ? 
_diffrn_standards_interval_count  ? 
_diffrn_standards_interval_time   ? 
_diffrn_standards_decay_%         ? 
_diffrn_reflns_number             24499 
_diffrn_reflns_av_R_equivalents   0.0476 
_diffrn_reflns_av_sigmaI/netI     0.0617 
_diffrn_reflns_limit_h_min        -14 
_diffrn_reflns_limit_h_max        14 
_diffrn_reflns_limit_k_min        -19 
_diffrn_reflns_limit_k_max        24 
_diffrn_reflns_limit_l_min        -20 
_diffrn_reflns_limit_l_max        26 
_diffrn_reflns_theta_min          1.51 
_diffrn_reflns_theta_max          27.48 
_reflns_number_total              9142 
_reflns_number_gt                 7675 
_reflns_threshold_expression      >2sigma(I) 
  
_computing_data_collection        'SMART 5 (Bruker-AXS, 2003)' 
_computing_cell_refinement        'SAINT 5 (Bruker-AXS, 2003)' 
_computing_data_reduction         'SAINT 5 (Bruker-AXS, 2003)' 
_computing_structure_solution     'SHELXS-97 (Sheldrick, 1990)' 
_computing_structure_refinement   'SHELXL-97 (Sheldrick, 1997)' 
_computing_molecular_graphics     'Bruker SHELXTL' 
_computing_publication_material   'Bruker SHELXTL' 
  
_refine_special_details 
; 
 Refinement of F^2^ against ALL reflections.  The weighted R-factor wR and 
 goodness of fit S are based on F^2^, conventional R-factors R are based 
 on F, with F set to zero for negative F^2^. The threshold expression of 
 F^2^ > 2sigma(F^2^) is used only for calculating R-factors(gt) etc. and is 
 not relevant to the choice of reflections for refinement.  R-factors based 
 on F^2^ are statistically about twice as large as those based on F, and R- 
 factors based on ALL data will be even larger. 
; 
  
_refine_ls_structure_factor_coef  Fsqd 
_refine_ls_matrix_type            full 
_refine_ls_weighting_scheme       calc 
_refine_ls_weighting_details 
 'calc w=1/[\s^2^(Fo^2^)+(0.0449P)^2^+8.1070P] where P=(Fo^2^+2Fc^2^)/3' 
_atom_sites_solution_primary      direct 
_atom_sites_solution_secondary    difmap 
_atom_sites_solution_hydrogens    geom 
_refine_ls_hydrogen_treatment     constr 
_refine_ls_extinction_method      none 
_refine_ls_extinction_coef        ? 
_refine_ls_number_reflns          9142 
_refine_ls_number_parameters      483 
_refine_ls_number_restraints      0 
_refine_ls_R_factor_all           0.0970 
_refine_ls_R_factor_gt            0.0764 
_refine_ls_wR_factor_ref          0.1470 
_refine_ls_wR_factor_gt           0.1393 
_refine_ls_goodness_of_fit_ref    1.201 
_refine_ls_restrained_S_all       1.201 
_refine_ls_shift/su_max           0.001 
_refine_ls_shift/su_mean          0.000 
  
loop_ 
 _atom_site_label 
 _atom_site_type_symbol 
 _atom_site_fract_x 
 _atom_site_fract_y 
 _atom_site_fract_z 
 _atom_site_U_iso_or_equiv 
 _atom_site_adp_type 
 _atom_site_occupancy 
 _atom_site_symmetry_multiplicity 
 _atom_site_calc_flag 
 _atom_site_refinement_flags 
 _atom_site_disorder_assembly 
 _atom_site_disorder_group 
Mo1 Mo 0.00808(3) 0.306394(18) 0.388945(17) 0.02005(10) Uani 1 1 d . . . 
S4 S 0.03261(11) 0.42451(6) 0.42299(6) 0.0288(2) Uani 1 1 d . . . 
N2 N -0.1463(3) 0.30364(19) 0.31130(17) 0.0255(7) Uani 1 1 d . . . 
N3 N -0.0243(3) 0.24508(18) 0.46023(17) 0.0244(7) Uani 1 1 d . . . 
N1 N 0.1547(3) 0.28988(17) 0.35504(17) 0.0242(7) Uani 1 1 d . . . 
F421 F 0.2337(3) 0.53079(14) 0.42104(14) 0.0444(7) Uani 1 1 d . . . 
C26 C -0.0854(5) 0.1978(2) 0.2559(2) 0.0331(10) Uani 1 1 d . . . 
H26A H -0.0171 0.2245 0.2481 0.040 Uiso 1 1 calc R . . 
F431 F 0.4397(3) 0.56465(15) 0.52058(17) 0.0507(8) Uani 1 1 d . . . 
F461 F 0.1276(3) 0.35956(17) 0.56780(15) 0.0553(9) Uani 1 1 d . . . 
C32 C 0.0094(4) 0.1207(2) 0.4295(2) 0.0292(10) Uani 1 1 d . . . 
H32A H -0.0600 0.1253 0.3899 0.035 Uiso 1 1 calc R . . 
C17 C 0.2013(4) 0.3264(2) 0.2996(2) 0.0288(10) Uani 1 1 d . . . 
C31 C 0.0461(4) 0.1788(2) 0.4730(2) 0.0237(9) Uani 1 1 d . . . 
C41 C 0.1721(4) 0.4435(2) 0.4895(2) 0.0262(9) Uani 1 1 d . . . 
C21 C -0.1693(4) 0.2307(2) 0.2870(2) 0.0253(9) Uani 1 1 d . . . 
C33 C 0.0731(5) 0.0561(2) 0.4432(2) 0.0325(10) Uani 1 1 d . . . 
C34 C 0.1715(5) 0.0496(2) 0.5019(2) 0.0333(10) Uani 1 1 d . . . 
H34A H 0.2133 0.0050 0.5124 0.040 Uiso 1 1 calc R . . 
C11 C 0.2502(4) 0.2472(2) 0.4008(2) 0.0271(9) Uani 1 1 d . . . 
C37 C -0.1254(4) 0.2505(2) 0.4981(2) 0.0300(10) Uani 1 1 d . . . 
C35 C 0.2107(4) 0.1074(2) 0.5462(2) 0.0299(10) Uani 1 1 d . . . 
C22 C -0.2699(4) 0.1906(3) 0.2971(2) 0.0336(10) Uani 1 1 d . . . 
H22A H -0.3280 0.2124 0.3182 0.040 Uiso 1 1 calc R . . 
C38 C -0.1902(6) 0.3230(3) 0.4818(3) 0.0582(17) Uani 1 1 d . . . 
H38A H -0.1279 0.3612 0.4965 0.087 Uiso 1 1 calc R . . 
H38B H -0.2557 0.3275 0.5062 0.087 Uiso 1 1 calc R . . 
H38C H -0.2287 0.3268 0.4321 0.087 Uiso 1 1 calc R . . 
C46 C 0.2020(5) 0.4108(3) 0.5536(2) 0.0360(11) Uani 1 1 d . . . 
C310 C -0.2206(5) 0.1898(3) 0.4765(3) 0.0467(13) Uani 1 1 d . . . 
H31A H -0.2583 0.1918 0.4267 0.070 Uiso 1 1 calc R . . 
H31B H -0.2869 0.1948 0.5004 0.070 Uiso 1 1 calc R . . 
H31C H -0.1777 0.1439 0.4887 0.070 Uiso 1 1 calc R . . 
F441 F 0.4924(3) 0.49628(19) 0.64284(18) 0.0685(10) Uani 1 1 d . . . 
C36 C 0.1490(4) 0.1716(2) 0.5309(2) 0.0283(9) Uani 1 1 d . . . 
H36A H 0.1766 0.2117 0.5600 0.034 Uiso 1 1 calc R . . 
C16 C 0.3271(4) 0.2784(3) 0.4597(2) 0.0315(10) Uani 1 1 d . . . 
H16A H 0.3129 0.3266 0.4702 0.038 Uiso 1 1 calc R . . 
F451 F 0.3330(4) 0.3942(2) 0.66597(16) 0.0717(11) Uani 1 1 d . . . 
C42 C 0.2552(4) 0.4956(2) 0.4809(2) 0.0303(10) Uani 1 1 d . . . 
C18 C 0.0941(5) 0.3693(3) 0.2534(2) 0.0349(11) Uani 1 1 d . . . 
H18A H 0.0241 0.3371 0.2324 0.052 Uiso 1 1 calc R . . 
H18B H 0.1238 0.3927 0.2172 0.052 Uiso 1 1 calc R . . 
H18C H 0.0654 0.4055 0.2809 0.052 Uiso 1 1 calc R . . 
C27 C -0.2455(4) 0.3566(2) 0.2735(2) 0.0321(10) Uani 1 1 d . . . 
C28 C -0.2083(5) 0.4315(3) 0.2986(3) 0.0412(12) Uani 1 1 d . . . 
H28A H -0.2060 0.4352 0.3473 0.062 Uiso 1 1 calc R . . 
H28B H -0.2699 0.4655 0.2718 0.062 Uiso 1 1 calc R . . 
H28C H -0.1247 0.4424 0.2927 0.062 Uiso 1 1 calc R . . 
C19 C 0.3079(5) 0.3783(3) 0.3316(2) 0.0379(11) Uani 1 1 d . . . 
H19A H 0.2782 0.4135 0.3596 0.057 Uiso 1 1 calc R . . 
H19B H 0.3349 0.4028 0.2950 0.057 Uiso 1 1 calc R . . 
H19C H 0.3792 0.3517 0.3607 0.057 Uiso 1 1 calc R . . 
C23 C -0.2866(5) 0.1195(3) 0.2770(2) 0.0380(12) Uani 1 1 d . . . 
C25 C -0.0999(5) 0.1258(2) 0.2361(2) 0.0369(11) Uani 1 1 d . . . 
C39 C -0.0708(5) 0.2448(3) 0.5760(2) 0.0414(12) Uani 1 1 d . . . 
H39A H -0.0351 0.1969 0.5876 0.062 Uiso 1 1 calc R . . 
H39B H -0.1377 0.2530 0.5988 0.062 Uiso 1 1 calc R . . 
H39C H -0.0044 0.2807 0.5914 0.062 Uiso 1 1 calc R . . 
C24 C -0.2020(5) 0.0880(2) 0.2463(2) 0.0396(12) Uani 1 1 d . . . 
H24A H -0.2138 0.0396 0.2320 0.047 Uiso 1 1 calc R . . 
C210 C -0.3777(5) 0.3424(3) 0.2822(3) 0.0506(14) Uani 1 1 d . . . 
H21A H -0.3728 0.3378 0.3312 0.076 Uiso 1 1 calc R . . 
H21B H -0.4111 0.2981 0.2583 0.076 Uiso 1 1 calc R . . 
H21C H -0.4334 0.3823 0.2626 0.076 Uiso 1 1 calc R . . 
C12 C 0.2692(5) 0.1761(2) 0.3858(3) 0.0364(11) Uani 1 1 d . . . 
H12A H 0.2145 0.1542 0.3465 0.044 Uiso 1 1 calc R . . 
C110 C 0.2493(5) 0.2718(3) 0.2564(3) 0.0406(12) Uani 1 1 d . . . 
H11A H 0.3217 0.2463 0.2857 0.061 Uiso 1 1 calc R . . 
H11B H 0.2751 0.2965 0.2195 0.061 Uiso 1 1 calc R . . 
H11C H 0.1821 0.2377 0.2363 0.061 Uiso 1 1 calc R . . 
C14 C 0.4437(5) 0.1699(3) 0.4856(3) 0.0525(16) Uani 1 1 d . . . 
H14A H 0.5114 0.1434 0.5140 0.063 Uiso 1 1 calc R . . 
C13 C 0.3670(5) 0.1369(3) 0.4275(3) 0.0462(14) Uani 1 1 d . . . 
C43 C 0.3613(4) 0.5136(2) 0.5317(3) 0.0352(11) Uani 1 1 d . . . 
C29 C -0.2541(5) 0.3536(3) 0.1966(2) 0.0460(13) Uani 1 1 d . . . 
H29A H -0.3193 0.3869 0.1718 0.069 Uiso 1 1 calc R . . 
H29B H -0.2759 0.3050 0.1796 0.069 Uiso 1 1 calc R . . 
H29C H -0.1727 0.3671 0.1893 0.069 Uiso 1 1 calc R . . 
C44 C 0.3881(5) 0.4795(3) 0.5934(3) 0.0421(12) Uani 1 1 d . . . 
C231 C -0.3927(6) 0.0779(3) 0.2929(3) 0.0567(16) Uani 1 1 d . . . 
H23A H -0.4066 0.0337 0.2660 0.085 Uiso 1 1 calc R . . 
H23B H -0.4698 0.1068 0.2810 0.085 Uiso 1 1 calc R . . 
H23C H -0.3707 0.0664 0.3421 0.085 Uiso 1 1 calc R . . 
C15 C 0.4258(4) 0.2397(3) 0.5038(3) 0.0426(13) Uani 1 1 d . . . 
C351 C 0.3214(5) 0.0996(3) 0.6094(2) 0.0415(12) Uani 1 1 d . . . 
H35A H 0.3598 0.1465 0.6227 0.062 Uiso 1 1 calc R . . 
H35B H 0.3840 0.0673 0.5991 0.062 Uiso 1 1 calc R . . 
H35C H 0.2919 0.0800 0.6474 0.062 Uiso 1 1 calc R . . 
C151 C 0.5053(6) 0.2744(4) 0.5679(3) 0.0669(19) Uani 1 1 d . . . 
H15A H 0.4588 0.2751 0.6031 0.100 Uiso 1 1 calc R . . 
H15B H 0.5253 0.3235 0.5575 0.100 Uiso 1 1 calc R . . 
H15C H 0.5836 0.2473 0.5850 0.100 Uiso 1 1 calc R . . 
C45 C 0.3085(5) 0.4276(3) 0.6052(3) 0.0448(13) Uani 1 1 d . . . 
C251 C -0.0044(6) 0.0908(3) 0.2056(3) 0.0516(15) Uani 1 1 d . . . 
H25A H -0.0354 0.0437 0.1875 0.077 Uiso 1 1 calc R . . 
H25B H 0.0753 0.0853 0.2413 0.077 Uiso 1 1 calc R . . 
H25C H 0.0091 0.1206 0.1683 0.077 Uiso 1 1 calc R . . 
C331 C 0.0339(5) -0.0063(3) 0.3942(3) 0.0432(13) Uani 1 1 d . . . 
H33A H -0.0371 0.0080 0.3558 0.065 Uiso 0.50 1 calc PR . . 
H33B H 0.0086 -0.0465 0.4186 0.065 Uiso 0.50 1 calc PR . . 
H33C H 0.1050 -0.0207 0.3766 0.065 Uiso 0.50 1 calc PR . . 
H33D H 0.0881 -0.0475 0.4116 0.065 Uiso 0.50 1 calc PR . . 
H33E H 0.0425 0.0071 0.3487 0.065 Uiso 0.50 1 calc PR . . 
H33F H -0.0540 -0.0187 0.3907 0.065 Uiso 0.50 1 calc PR . . 
C131 C 0.3902(7) 0.0607(3) 0.4104(4) 0.072(2) Uani 1 1 d . . . 
H13A H 0.3487 0.0285 0.4358 0.108 Uiso 1 1 calc R . . 
H13B H 0.4810 0.0513 0.4235 0.108 Uiso 1 1 calc R . . 
H13C H 0.3559 0.0528 0.3609 0.108 Uiso 1 1 calc R . . 
  
loop_ 
 _atom_site_aniso_label 
 _atom_site_aniso_U_11 
 _atom_site_aniso_U_22 
 _atom_site_aniso_U_33 
 _atom_site_aniso_U_23 
 _atom_site_aniso_U_13 
 _atom_site_aniso_U_12 
Mo1 0.02210(18) 0.01655(16) 0.02160(17) -0.00085(14) 0.00600(12) -0.00151(15) 
S4 0.0315(6) 0.0203(5) 0.0309(6) -0.0031(4) 0.0017(5) 0.0001(4) 
N2 0.0248(18) 0.0208(17) 0.0285(17) -0.0019(15) 0.0027(14) 0.0007(15) 
N3 0.031(2) 0.0198(17) 0.0255(18) -0.0012(14) 0.0133(15) 0.0005(15) 
N1 0.0242(18) 0.0216(18) 0.0270(18) 0.0026(13) 0.0069(15) 0.0020(14) 
F421 0.0575(19) 0.0299(15) 0.0441(16) 0.0062(12) 0.0103(14) -0.0088(13) 
C26 0.046(3) 0.026(2) 0.026(2) -0.0014(18) 0.008(2) -0.006(2) 
F431 0.0404(17) 0.0372(17) 0.074(2) -0.0027(15) 0.0139(16) -0.0153(13) 
F461 0.067(2) 0.057(2) 0.0381(16) 0.0033(14) 0.0066(15) -0.0345(17) 
C32 0.033(3) 0.027(2) 0.029(2) 0.0059(18) 0.0120(19) -0.0007(19) 
C17 0.032(2) 0.026(2) 0.030(2) 0.0051(17) 0.0122(19) -0.0012(18) 
C31 0.026(2) 0.015(2) 0.032(2) 0.0010(16) 0.0125(18) 0.0006(16) 
C41 0.025(2) 0.019(2) 0.033(2) -0.0063(17) 0.0070(18) -0.0013(17) 
C21 0.031(2) 0.022(2) 0.0186(19) -0.0014(16) -0.0010(17) -0.0037(18) 
C33 0.040(3) 0.025(2) 0.039(3) 0.0000(19) 0.021(2) -0.001(2) 
C34 0.045(3) 0.021(2) 0.040(3) 0.0079(19) 0.022(2) 0.008(2) 
C11 0.025(2) 0.026(2) 0.034(2) 0.0046(18) 0.0133(19) 0.0000(18) 
C37 0.030(2) 0.031(2) 0.034(2) 0.0012(19) 0.0168(19) 0.0014(19) 
C35 0.037(3) 0.030(2) 0.026(2) 0.0069(18) 0.0144(19) 0.006(2) 
C22 0.033(2) 0.035(2) 0.028(2) 0.002(2) 0.0013(19) -0.002(2) 
C38 0.069(4) 0.049(4) 0.075(4) 0.021(3) 0.051(4) 0.026(3) 
C46 0.041(3) 0.034(3) 0.033(2) -0.004(2) 0.011(2) -0.011(2) 
C310 0.037(3) 0.061(4) 0.046(3) -0.011(3) 0.018(2) -0.012(3) 
F441 0.055(2) 0.069(2) 0.063(2) 0.0015(18) -0.0171(17) -0.0253(18) 
C36 0.034(3) 0.024(2) 0.029(2) -0.0002(17) 0.0122(19) -0.0001(18) 
C16 0.021(2) 0.037(3) 0.038(2) 0.007(2) 0.0090(19) 0.0029(19) 
F451 0.083(3) 0.079(3) 0.0352(17) 0.0148(16) -0.0144(17) -0.034(2) 
C42 0.037(3) 0.021(2) 0.033(2) -0.0028(18) 0.010(2) 0.0038(19) 
C18 0.037(3) 0.038(3) 0.032(2) 0.011(2) 0.012(2) 0.000(2) 
C27 0.030(2) 0.028(2) 0.034(2) 0.0016(19) 0.000(2) 0.0052(19) 
C28 0.031(3) 0.029(3) 0.053(3) 0.000(2) -0.006(2) 0.006(2) 
C19 0.036(3) 0.038(3) 0.040(3) 0.009(2) 0.012(2) -0.010(2) 
C23 0.048(3) 0.031(3) 0.029(2) 0.0018(19) -0.001(2) -0.017(2) 
C25 0.059(3) 0.027(2) 0.023(2) -0.0023(18) 0.008(2) 0.000(2) 
C39 0.046(3) 0.048(3) 0.038(3) -0.009(2) 0.025(2) -0.014(2) 
C24 0.059(3) 0.020(2) 0.031(2) -0.0014(18) -0.003(2) -0.012(2) 
C210 0.035(3) 0.048(3) 0.067(4) 0.008(3) 0.012(3) 0.012(2) 
C12 0.046(3) 0.025(2) 0.047(3) 0.007(2) 0.028(2) 0.006(2) 
C110 0.053(3) 0.038(3) 0.039(3) 0.002(2) 0.028(2) 0.000(2) 
C14 0.033(3) 0.057(4) 0.075(4) 0.040(3) 0.026(3) 0.020(3) 
C13 0.046(3) 0.037(3) 0.068(4) 0.018(3) 0.036(3) 0.014(2) 
C43 0.031(3) 0.024(2) 0.052(3) -0.007(2) 0.012(2) -0.0050(19) 
C29 0.051(3) 0.045(3) 0.034(3) 0.004(2) -0.003(2) 0.010(3) 
C44 0.033(3) 0.044(3) 0.044(3) -0.004(2) -0.001(2) -0.006(2) 
C231 0.066(4) 0.044(3) 0.053(3) 0.003(3) 0.006(3) -0.023(3) 
C15 0.022(2) 0.059(3) 0.045(3) 0.024(3) 0.005(2) 0.003(2) 
C351 0.044(3) 0.043(3) 0.035(3) 0.008(2) 0.008(2) 0.011(2) 
C151 0.040(3) 0.092(5) 0.058(4) 0.028(4) -0.004(3) 0.000(3) 
C45 0.054(3) 0.043(3) 0.032(3) 0.000(2) 0.001(2) -0.011(3) 
C251 0.073(4) 0.035(3) 0.051(3) -0.012(2) 0.022(3) 0.004(3) 
C331 0.061(4) 0.023(2) 0.048(3) -0.004(2) 0.020(3) -0.002(2) 
C131 0.089(5) 0.041(3) 0.112(6) 0.023(3) 0.070(5) 0.032(3) 
  
_geom_special_details 
; 
 All esds (except the esd in the dihedral angle between two l.s. planes) 
 are estimated using the full covariance matrix.  The cell esds are taken 
 into account individually in the estimation of esds in distances, angles 
 and torsion angles; correlations between esds in cell parameters are only 
 used when they are defined by crystal symmetry.  An approximate (isotropic) 
 treatment of cell esds is used for estimating esds involving l.s. planes. 
; 
  
loop_ 
 _geom_bond_atom_site_label_1 
 _geom_bond_atom_site_label_2 
 _geom_bond_distance 
 _geom_bond_site_symmetry_2 
 _geom_bond_publ_flag 
Mo1 N1 1.939(3) . ? 
Mo1 N3 1.945(3) . ? 
Mo1 N2 1.979(3) . ? 
Mo1 S4 2.3087(11) . ? 
S4 C41 1.783(4) . ? 
N2 C21 1.449(5) . ? 
N2 C27 1.520(5) . ? 
N3 C31 1.449(5) . ? 
N3 C37 1.512(5) . ? 
N1 C11 1.441(5) . ? 
N1 C17 1.512(5) . ? 
F421 C42 1.340(5) . ? 
C26 C21 1.391(6) . ? 
C26 C25 1.402(6) . ? 
F431 C43 1.346(5) . ? 
F461 C46 1.342(5) . ? 
C32 C31 1.387(6) . ? 
C32 C33 1.389(6) . ? 
C17 C18 1.521(6) . ? 
C17 C110 1.526(6) . ? 
C17 C19 1.527(6) . ? 
C31 C36 1.398(6) . ? 
C41 C42 1.378(6) . ? 
C41 C46 1.388(6) . ? 
C21 C22 1.397(6) . ? 
C33 C34 1.379(7) . ? 
C33 C331 1.515(6) . ? 
C34 C35 1.396(6) . ? 
C11 C16 1.389(6) . ? 
C11 C12 1.393(6) . ? 
C37 C38 1.526(7) . ? 
C37 C310 1.528(7) . ? 
C37 C39 1.529(6) . ? 
C35 C36 1.374(6) . ? 
C35 C351 1.517(6) . ? 
C22 C23 1.388(7) . ? 
C46 C45 1.379(7) . ? 
F441 C44 1.342(6) . ? 
C16 C15 1.407(6) . ? 
F451 C45 1.338(6) . ? 
C42 C43 1.374(6) . ? 
C27 C28 1.509(6) . ? 
C27 C29 1.528(7) . ? 
C27 C210 1.535(7) . ? 
C23 C24 1.380(7) . ? 
C23 C231 1.508(7) . ? 
C25 C24 1.390(7) . ? 
C25 C251 1.502(7) . ? 
C12 C13 1.385(7) . ? 
C14 C15 1.385(8) . ? 
C14 C13 1.392(9) . ? 
C13 C131 1.505(8) . ? 
C43 C44 1.358(7) . ? 
C44 C45 1.370(7) . ? 
C15 C151 1.501(8) . ? 
  
loop_ 
 _geom_angle_atom_site_label_1 
 _geom_angle_atom_site_label_2 
 _geom_angle_atom_site_label_3 
 _geom_angle 
 _geom_angle_site_symmetry_1 
 _geom_angle_site_symmetry_3 
 _geom_angle_publ_flag 
N1 Mo1 N3 120.07(14) . . ? 
N1 Mo1 N2 109.65(14) . . ? 
N3 Mo1 N2 106.32(15) . . ? 
N1 Mo1 S4 102.43(10) . . ? 
N3 Mo1 S4 112.01(10) . . ? 
N2 Mo1 S4 105.52(11) . . ? 
C41 S4 Mo1 115.05(14) . . ? 
C21 N2 C27 114.0(3) . . ? 
C21 N2 Mo1 109.1(3) . . ? 
C27 N2 Mo1 136.8(3) . . ? 
C31 N3 C37 113.5(3) . . ? 
C31 N3 Mo1 116.2(3) . . ? 
C37 N3 Mo1 129.7(3) . . ? 
C11 N1 C17 113.0(3) . . ? 
C11 N1 Mo1 113.3(3) . . ? 
C17 N1 Mo1 131.9(3) . . ? 
C21 C26 C25 121.1(4) . . ? 
C31 C32 C33 120.7(4) . . ? 
N1 C17 C18 109.3(3) . . ? 
N1 C17 C110 110.9(4) . . ? 
C18 C17 C110 109.5(4) . . ? 
N1 C17 C19 110.5(4) . . ? 
C18 C17 C19 107.9(4) . . ? 
C110 C17 C19 108.7(4) . . ? 
C32 C31 C36 119.1(4) . . ? 
C32 C31 N3 120.4(4) . . ? 
C36 C31 N3 120.4(4) . . ? 
C42 C41 C46 115.4(4) . . ? 
C42 C41 S4 120.9(3) . . ? 
C46 C41 S4 123.7(3) . . ? 
C26 C21 C22 118.4(4) . . ? 
C26 C21 N2 119.5(4) . . ? 
C22 C21 N2 122.0(4) . . ? 
C34 C33 C32 119.1(4) . . ? 
C34 C33 C331 120.9(4) . . ? 
C32 C33 C331 120.0(4) . . ? 
C33 C34 C35 121.3(4) . . ? 
C16 C11 C12 119.7(4) . . ? 
C16 C11 N1 119.2(4) . . ? 
C12 C11 N1 121.1(4) . . ? 
N3 C37 C38 108.4(4) . . ? 
N3 C37 C310 110.4(4) . . ? 
C38 C37 C310 110.7(5) . . ? 
N3 C37 C39 111.9(4) . . ? 
C38 C37 C39 108.5(4) . . ? 
C310 C37 C39 106.9(4) . . ? 
C36 C35 C34 118.9(4) . . ? 
C36 C35 C351 120.7(4) . . ? 
C34 C35 C351 120.3(4) . . ? 
C23 C22 C21 121.3(5) . . ? 
F461 C46 C45 116.5(4) . . ? 
F461 C46 C41 120.5(4) . . ? 
C45 C46 C41 123.0(4) . . ? 
C35 C36 C31 120.8(4) . . ? 
C11 C16 C15 121.0(5) . . ? 
F421 C42 C43 117.4(4) . . ? 
F421 C42 C41 119.9(4) . . ? 
C43 C42 C41 122.7(4) . . ? 
C28 C27 N2 110.1(4) . . ? 
C28 C27 C29 108.1(4) . . ? 
N2 C27 C29 109.0(4) . . ? 
C28 C27 C210 107.6(4) . . ? 
N2 C27 C210 114.0(4) . . ? 
C29 C27 C210 107.8(4) . . ? 
C24 C23 C22 119.2(4) . . ? 
C24 C23 C231 121.9(5) . . ? 
C22 C23 C231 118.8(5) . . ? 
C24 C25 C26 118.7(5) . . ? 
C24 C25 C251 121.4(4) . . ? 
C26 C25 C251 119.8(5) . . ? 
C23 C24 C25 121.3(4) . . ? 
C13 C12 C11 120.7(5) . . ? 
C15 C14 C13 123.0(5) . . ? 
C12 C13 C14 118.3(5) . . ? 
C12 C13 C131 121.0(6) . . ? 
C14 C13 C131 120.7(5) . . ? 
F431 C43 C44 119.7(4) . . ? 
F431 C43 C42 120.3(4) . . ? 
C44 C43 C42 120.0(4) . . ? 
F441 C44 C43 120.2(5) . . ? 
F441 C44 C45 119.7(5) . . ? 
C43 C44 C45 120.0(5) . . ? 
C14 C15 C16 117.3(5) . . ? 
C14 C15 C151 123.0(5) . . ? 
C16 C15 C151 119.8(5) . . ? 
F451 C45 C44 120.7(5) . . ? 
F451 C45 C46 120.4(5) . . ? 
C44 C45 C46 118.9(5) . . ? 
  
_diffrn_measured_fraction_theta_max    0.996 
_diffrn_reflns_theta_full              27.48 
_diffrn_measured_fraction_theta_full   0.996 
_refine_diff_density_max    0.711 
_refine_diff_density_min   -1.477 
_refine_diff_density_rms    0.096 

  
data_04077 
  
_audit_creation_method            SHELXL-97 
_chemical_name_systematic 
; 
 ? 
; 
_chemical_name_common             ? 
_chemical_melting_point           ? 
_chemical_formula_moiety          ? 
_chemical_formula_sum 
 'C45 H64 Mo N3 O2.50' 
_chemical_formula_weight          782.93 
  
loop_ 
 _atom_type_symbol 
 _atom_type_description 
 _atom_type_scat_dispersion_real 
 _atom_type_scat_dispersion_imag 
 _atom_type_scat_source 
 'C'  'C'   0.0033   0.0016 
 'International Tables Vol C Tables 4.2.6.8 and 6.1.1.4' 
 'H'  'H'   0.0000   0.0000 
 'International Tables Vol C Tables 4.2.6.8 and 6.1.1.4' 
 'N'  'N'   0.0061   0.0033 
 'International Tables Vol C Tables 4.2.6.8 and 6.1.1.4' 
 'O'  'O'   0.0106   0.0060 
 'International Tables Vol C Tables 4.2.6.8 and 6.1.1.4' 
 'Mo'  'Mo'  -1.6832   0.6857 
 'International Tables Vol C Tables 4.2.6.8 and 6.1.1.4' 
  
_symmetry_cell_setting            Triclinic 
_symmetry_space_group_name_H-M    P-1 
  
loop_ 
 _symmetry_equiv_pos_as_xyz 
 'x, y, z' 
 '-x, -y, -z' 
  
_cell_length_a                    10.8341(11) 
_cell_length_b                    19.982(2) 
_cell_length_c                    20.569(2) 
_cell_angle_alpha                 89.669(2) 
_cell_angle_beta                  81.701(2) 
_cell_angle_gamma                 75.221(2) 
_cell_volume                      4258.2(7) 
_cell_formula_units_Z             4 
_cell_measurement_temperature     193(2) 
_cell_measurement_reflns_used     3242 
_cell_measurement_theta_min       2.59 
_cell_measurement_theta_max       28.30 
  
_exptl_crystal_description        rod	 
_exptl_crystal_colour             purple 
_exptl_crystal_size_max           0.45 
_exptl_crystal_size_mid           0.20 
_exptl_crystal_size_min           0.15 
_exptl_crystal_density_meas       'not measured' 
_exptl_crystal_density_diffrn     1.221 
_exptl_crystal_density_method     'not measured' 
_exptl_crystal_F_000              1668 
_exptl_absorpt_coefficient_mu     0.347 
_exptl_absorpt_correction_type    multi-scan 
_exptl_absorpt_correction_T_min   0.8482 
_exptl_absorpt_correction_T_max   0.9530 
_exptl_absorpt_process_details    sadabs 
  
_exptl_special_details 
; 
 'Siemens three-circle diffractometer, Bruker APEX CCD' 
; 
  
_diffrn_ambient_temperature       193(2) 
_diffrn_radiation_wavelength      0.71073 
_diffrn_radiation_type            MoK\a 
_diffrn_radiation_source          'fine-focus sealed tube' 
_diffrn_radiation_monochromator   graphite 
_diffrn_measurement_device_type   'Bruker Smart APEX CCD' 
_diffrn_measurement_method        'omega scans' 
_diffrn_detector_area_resol_mean  ? 
_diffrn_standards_number          ? 
_diffrn_standards_interval_count  ? 
_diffrn_standards_interval_time   ? 
_diffrn_standards_decay_%         ? 
_diffrn_reflns_number             29816 
_diffrn_reflns_av_R_equivalents   0.0192 
_diffrn_reflns_av_sigmaI/netI     0.0384 
_diffrn_reflns_limit_h_min        -14 
_diffrn_reflns_limit_h_max        14 
_diffrn_reflns_limit_k_min        -26 
_diffrn_reflns_limit_k_max        19 
_diffrn_reflns_limit_l_min        -26 
_diffrn_reflns_limit_l_max        27 
_diffrn_reflns_theta_min          1.43 
_diffrn_reflns_theta_max          27.88 
_reflns_number_total              20113 
_reflns_number_gt                 16638 
_reflns_threshold_expression      >2sigma(I) 
  
_computing_data_collection        'SMART 5 (Bruker-AXS, 2003)' 
_computing_cell_refinement        'SAINT 5 (Bruker-AXS, 2003)' 
_computing_data_reduction         'SAINT 5 (Bruker-AXS, 2003)' 
_computing_structure_solution     'SHELXS-97 (Sheldrick, 1990)' 
_computing_structure_refinement   'SHELXL-97 (Sheldrick, 1997)' 
_computing_molecular_graphics     'Bruker SHELXTL' 
_computing_publication_material   'Bruker SHELXTL' 
  
_refine_special_details 
; 
 Refinement of F^2^ against ALL reflections.  The weighted R-factor wR and 
 goodness of fit S are based on F^2^, conventional R-factors R are based 
 on F, with F set to zero for negative F^2^. The threshold expression of 
 F^2^ > 2sigma(F^2^) is used only for calculating R-factors(gt) etc. and is 
 not relevant to the choice of reflections for refinement.  R-factors based 
 on F^2^ are statistically about twice as large as those based on F, and R- 
 factors based on ALL data will be even larger. 
; 
  
_refine_ls_structure_factor_coef  Fsqd 
_refine_ls_matrix_type            full 
_refine_ls_weighting_scheme       calc 
_refine_ls_weighting_details 
 'calc w=1/[\s^2^(Fo^2^)+(0.0536P)^2^+0.9498P] where P=(Fo^2^+2Fc^2^)/3' 
_atom_sites_solution_primary      direct 
_atom_sites_solution_secondary    difmap 
_atom_sites_solution_hydrogens    geom 
_refine_ls_hydrogen_treatment     constr 
_refine_ls_extinction_method      none 
_refine_ls_extinction_coef        ? 
_refine_ls_number_reflns          20113 
_refine_ls_number_parameters      957 
_refine_ls_number_restraints      31 
_refine_ls_R_factor_all           0.0483 
_refine_ls_R_factor_gt            0.0382 
_refine_ls_wR_factor_ref          0.1008 
_refine_ls_wR_factor_gt           0.0947 
_refine_ls_goodness_of_fit_ref    1.024 
_refine_ls_restrained_S_all       1.024 
_refine_ls_shift/su_max           0.002 
_refine_ls_shift/su_mean          0.000 
  
loop_ 
 _atom_site_label 
 _atom_site_type_symbol 
 _atom_site_fract_x 
 _atom_site_fract_y 
 _atom_site_fract_z 
 _atom_site_U_iso_or_equiv 
 _atom_site_adp_type 
 _atom_site_occupancy 
 _atom_site_symmetry_multiplicity 
 _atom_site_calc_flag 
 _atom_site_refinement_flags 
 _atom_site_disorder_assembly 
 _atom_site_disorder_group 
Mo1 Mo 0.714780(16) 0.812782(8) 0.535270(8) 0.02317(5) Uani 1 1 d . . . 
N1 N 0.71271(16) 0.84519(8) 0.62581(8) 0.0262(3) Uani 1 1 d . . . 
Mo2 Mo 0.294309(16) 0.684575(8) 0.082541(7) 0.02438(5) Uani 1 1 d . . . 
N2 N 0.85841(16) 0.73383(8) 0.50564(8) 0.0279(3) Uani 1 1 d . . . 
N3 N 0.54780(15) 0.79696(8) 0.53131(8) 0.0253(3) Uani 1 1 d . . . 
O4 O 0.74626(14) 0.87694(7) 0.46329(7) 0.0308(3) Uani 1 1 d . . . 
N5 N 0.15288(16) 0.76694(9) 0.08534(8) 0.0298(4) Uani 1 1 d . . . 
N6 N 0.45933(16) 0.69829(8) 0.04569(8) 0.0268(3) Uani 1 1 d . . . 
N7 N 0.31545(17) 0.64546(8) 0.16977(8) 0.0285(4) Uani 1 1 d . . . 
O8 O 0.24245(14) 0.62613(7) 0.01731(7) 0.0329(3) Uani 1 1 d . . . 
C11 C 0.6928(2) 0.79359(10) 0.67297(9) 0.0284(4) Uani 1 1 d . . . 
C12 C 0.7923(2) 0.73567(11) 0.67895(10) 0.0350(5) Uani 1 1 d . . . 
H12A H 0.8745 0.7319 0.6536 0.042 Uiso 1 1 calc R . . 
C13 C 0.7754(3) 0.68261(12) 0.72106(12) 0.0460(6) Uani 1 1 d . . . 
C14 C 0.6560(3) 0.68967(15) 0.75836(12) 0.0516(7) Uani 1 1 d . . . 
H14A H 0.6432 0.6542 0.7875 0.062 Uiso 1 1 calc R . . 
C15 C 0.5545(3) 0.74709(15) 0.75450(11) 0.0466(6) Uani 1 1 d . . . 
C16 C 0.5730(2) 0.79887(13) 0.71135(10) 0.0371(5) Uani 1 1 d . . . 
H16A H 0.5034 0.8382 0.7080 0.045 Uiso 1 1 calc R . . 
C17 C 0.7283(2) 0.91117(11) 0.65482(10) 0.0350(5) Uani 1 1 d . . . 
C18 C 0.6070(3) 0.95020(13) 0.70143(13) 0.0550(7) Uani 1 1 d . . . 
H18A H 0.5320 0.9593 0.6781 0.083 Uiso 1 1 calc R . . 
H18B H 0.6193 0.9942 0.7164 0.083 Uiso 1 1 calc R . . 
H18C H 0.5926 0.9219 0.7395 0.083 Uiso 1 1 calc R . . 
C19 C 0.7559(3) 0.95825(11) 0.59899(11) 0.0431(6) Uani 1 1 d . . . 
H19A H 0.8353 0.9348 0.5702 0.065 Uiso 1 1 calc R . . 
H19B H 0.7664 1.0013 0.6173 0.065 Uiso 1 1 calc R . . 
H19C H 0.6838 0.9689 0.5736 0.065 Uiso 1 1 calc R . . 
C21 C 0.84142(19) 0.66749(10) 0.48836(10) 0.0295(4) Uani 1 1 d . . . 
C22 C 0.8240(2) 0.62155(10) 0.53791(11) 0.0334(4) Uani 1 1 d . . . 
H22A H 0.8184 0.6357 0.5825 0.040 Uiso 1 1 calc R . . 
C23 C 0.8145(2) 0.55516(11) 0.52328(12) 0.0378(5) Uani 1 1 d . . . 
C24 C 0.8230(2) 0.53545(11) 0.45788(13) 0.0418(5) Uani 1 1 d . . . 
H24A H 0.8181 0.4901 0.4474 0.050 Uiso 1 1 calc R . . 
C25 C 0.8385(2) 0.58036(12) 0.40735(12) 0.0402(5) Uani 1 1 d . . . 
C26 C 0.8456(2) 0.64687(11) 0.42298(11) 0.0348(5) Uani 1 1 d . . . 
H26A H 0.8533 0.6785 0.3890 0.042 Uiso 1 1 calc R . . 
C27 C 0.9989(2) 0.73632(12) 0.49557(11) 0.0364(5) Uani 1 1 d . . . 
C28 C 1.0518(3) 0.73299(16) 0.42209(13) 0.0553(7) Uani 1 1 d . . . 
H28A H 1.0576 0.6870 0.4035 0.083 Uiso 1 1 calc R . . 
H28B H 1.1378 0.7415 0.4162 0.083 Uiso 1 1 calc R . . 
H28C H 0.9939 0.7683 0.3995 0.083 Uiso 1 1 calc R . . 
C29 C 1.0063(2) 0.80484(12) 0.52471(13) 0.0435(5) Uani 1 1 d . . . 
H29A H 0.9564 0.8432 0.5018 0.065 Uiso 1 1 calc R . . 
H29B H 1.0966 0.8069 0.5196 0.065 Uiso 1 1 calc R . . 
H29C H 0.9706 0.8085 0.5715 0.065 Uiso 1 1 calc R . . 
C31 C 0.52602(18) 0.72903(9) 0.52782(10) 0.0258(4) Uani 1 1 d . . . 
C32 C 0.5037(2) 0.69420(10) 0.58560(10) 0.0313(4) Uani 1 1 d . . . 
H32A H 0.5112 0.7135 0.6265 0.038 Uiso 1 1 calc R . . 
C33 C 0.4706(2) 0.63141(11) 0.58383(11) 0.0365(5) Uani 1 1 d . . . 
C34 C 0.4598(2) 0.60440(11) 0.52352(12) 0.0392(5) Uani 1 1 d . . . 
H34A H 0.4339 0.5625 0.5220 0.047 Uiso 1 1 calc R . . 
C35 C 0.4860(2) 0.63699(11) 0.46539(11) 0.0364(5) Uani 1 1 d . . . 
C36 C 0.5197(2) 0.69949(10) 0.46813(10) 0.0311(4) Uani 1 1 d . . . 
H36A H 0.5387 0.7221 0.4286 0.037 Uiso 1 1 calc R . . 
C37 C 0.42553(19) 0.85467(10) 0.53369(10) 0.0301(4) Uani 1 1 d . . . 
C38 C 0.3714(2) 0.85672(13) 0.46886(12) 0.0462(6) Uani 1 1 d . . . 
H38A H 0.4390 0.8588 0.4323 0.069 Uiso 1 1 calc R . . 
H38B H 0.2988 0.8977 0.4692 0.069 Uiso 1 1 calc R . . 
H38C H 0.3417 0.8149 0.4635 0.069 Uiso 1 1 calc R . . 
C39 C 0.4579(2) 0.92321(11) 0.54469(14) 0.0471(6) Uani 1 1 d . . . 
H39A H 0.4913 0.9228 0.5866 0.071 Uiso 1 1 calc R . . 
H39B H 0.3799 0.9613 0.5458 0.071 Uiso 1 1 calc R . . 
H39C H 0.5234 0.9296 0.5088 0.071 Uiso 1 1 calc R . . 
C41 C 0.7336(2) 0.86764(11) 0.40123(10) 0.0345(5) Uani 1 1 d . . . 
C42 C 0.7799(2) 0.91820(11) 0.35620(10) 0.0326(4) Uani 1 1 d . . . 
C43 C 0.8654(2) 0.95347(12) 0.37363(12) 0.0412(5) Uani 1 1 d . . . 
H43A H 0.8952 0.9464 0.4150 0.049 Uiso 1 1 calc R . . 
C44 C 0.9076(3) 0.99931(14) 0.33025(15) 0.0561(7) Uani 1 1 d . . . 
H44A H 0.9681 1.0227 0.3415 0.067 Uiso 1 1 calc R . . 
C45 C 0.8620(3) 1.01092(14) 0.27113(14) 0.0648(9) Uani 1 1 d . . . 
H45A H 0.8905 1.0427 0.2419 0.078 Uiso 1 1 calc R . . 
C46 C 0.7754(4) 0.97671(15) 0.25408(13) 0.0671(9) Uani 1 1 d . . . 
H46A H 0.7432 0.9855 0.2134 0.080 Uiso 1 1 calc R . . 
C47 C 0.7349(3) 0.92961(13) 0.29607(12) 0.0497(6) Uani 1 1 d . . . 
H47A H 0.6768 0.9052 0.2839 0.060 Uiso 1 1 calc R . . 
O48 O 0.6886(2) 0.82320(10) 0.38170(8) 0.0597(5) Uani 1 1 d . . . 
C51 C 0.16852(19) 0.83266(11) 0.06214(10) 0.0315(4) Uani 1 1 d . . . 
C52 C 0.1926(2) 0.87996(11) 0.10478(11) 0.0352(5) Uani 1 1 d . . . 
H52A H 0.2048 0.8673 0.1484 0.042 Uiso 1 1 calc R . . 
C53 C 0.1991(2) 0.94572(12) 0.08429(14) 0.0448(6) Uani 1 1 d . . . 
C54 C 0.1809(2) 0.96257(13) 0.01990(15) 0.0538(7) Uani 1 1 d . . . 
H54A H 0.1840 1.0075 0.0056 0.065 Uiso 1 1 calc R . . 
C55 C 0.1589(2) 0.91695(14) -0.02313(13) 0.0472(6) Uani 1 1 d . . . 
C56 C 0.1551(2) 0.85071(12) -0.00261(11) 0.0388(5) Uani 1 1 d . . . 
H56A H 0.1433 0.8179 -0.0328 0.047 Uiso 1 1 calc R . . 
C57 C 0.0126(2) 0.76793(12) 0.10770(12) 0.0389(5) Uani 1 1 d . . . 
C58 C -0.0492(2) 0.82344(15) 0.16172(14) 0.0543(7) Uani 1 1 d . . . 
H58A H 0.0013 0.8158 0.1982 0.081 Uiso 1 1 calc R . . 
H58B H -0.1375 0.8208 0.1775 0.081 Uiso 1 1 calc R . . 
H58C H -0.0510 0.8693 0.1441 0.081 Uiso 1 1 calc R . . 
C59 C -0.0639(2) 0.78137(17) 0.05007(14) 0.0594(8) Uani 1 1 d . . . 
H59A H -0.0664 0.8280 0.0342 0.089 Uiso 1 1 calc R . . 
H59B H -0.1521 0.7777 0.0645 0.089 Uiso 1 1 calc R . . 
H59C H -0.0223 0.7471 0.0145 0.089 Uiso 1 1 calc R . . 
C61 C 0.48130(19) 0.76642(10) 0.03878(10) 0.0279(4) Uani 1 1 d . . . 
C62 C 0.4737(2) 0.79988(11) -0.02052(10) 0.0331(4) Uani 1 1 d . . . 
H62A H 0.4482 0.7792 -0.0561 0.040 Uiso 1 1 calc R . . 
C63 C 0.5033(2) 0.86363(12) -0.02807(12) 0.0389(5) Uani 1 1 d . . . 
C64 C 0.5397(2) 0.89322(11) 0.02436(12) 0.0407(5) Uani 1 1 d . . . 
H64A H 0.5625 0.9360 0.0189 0.049 Uiso 1 1 calc R . . 
C65 C 0.5438(2) 0.86202(11) 0.08463(12) 0.0367(5) Uani 1 1 d . . . 
C66 C 0.5143(2) 0.79815(10) 0.09126(10) 0.0319(4) Uani 1 1 d . . . 
H66A H 0.5167 0.7760 0.1322 0.038 Uiso 1 1 calc R . . 
C67 C 0.5773(2) 0.64017(11) 0.02114(11) 0.0340(5) Uani 1 1 d . . . 
C68 C 0.5493(2) 0.57180(11) 0.04310(14) 0.0462(6) Uani 1 1 d . . . 
H68A H 0.5331 0.5718 0.0912 0.069 Uiso 1 1 calc R . . 
H68B H 0.6237 0.5334 0.0268 0.069 Uiso 1 1 calc R . . 
H68C H 0.4731 0.5662 0.0254 0.069 Uiso 1 1 calc R . . 
C69 C 0.6051(3) 0.63873(14) -0.05403(12) 0.0482(6) Uani 1 1 d . . . 
H69A H 0.5290 0.6338 -0.0722 0.072 Uiso 1 1 calc R . . 
H69B H 0.6786 0.5995 -0.0694 0.072 Uiso 1 1 calc R . . 
H69C H 0.6255 0.6820 -0.0686 0.072 Uiso 1 1 calc R . . 
C71 C 0.3568(2) 0.69106(10) 0.21126(9) 0.0291(4) Uani 1 1 d . . . 
C72 C 0.4863(2) 0.68009(11) 0.21889(10) 0.0332(4) Uani 1 1 d . . . 
H72A H 0.5472 0.6400 0.1989 0.040 Uiso 1 1 calc R . . 
C73 C 0.5286(2) 0.72628(12) 0.25498(10) 0.0376(5) Uani 1 1 d . . . 
C74 C 0.4381(2) 0.78462(12) 0.28429(10) 0.0403(5) Uani 1 1 d . . . 
H74A H 0.4657 0.8164 0.3092 0.048 Uiso 1 1 calc R . . 
C75 C 0.3087(2) 0.79739(11) 0.27793(11) 0.0399(5) Uani 1 1 d . . . 
C76 C 0.2693(2) 0.74976(11) 0.24124(10) 0.0349(5) Uani 1 1 d . . . 
H76A H 0.1807 0.7578 0.2368 0.042 Uiso 1 1 calc R . . 
C77 C 0.2966(2) 0.57973(11) 0.20070(11) 0.0395(5) Uani 1 1 d . . . 
C78 C 0.2536(3) 0.53774(12) 0.15042(12) 0.0486(6) Uani 1 1 d . . . 
H78A H 0.1721 0.5647 0.1378 0.073 Uiso 1 1 calc R . . 
H78B H 0.2415 0.4945 0.1698 0.073 Uiso 1 1 calc R . . 
H78C H 0.3198 0.5270 0.1114 0.073 Uiso 1 1 calc R . . 
C79 C 0.4209(3) 0.53505(13) 0.22176(14) 0.0569(7) Uani 1 1 d . . . 
H79A H 0.4900 0.5259 0.1840 0.085 Uiso 1 1 calc R . . 
H79B H 0.4063 0.4911 0.2380 0.085 Uiso 1 1 calc R . . 
H79C H 0.4459 0.5596 0.2568 0.085 Uiso 1 1 calc R . . 
C81 C 0.2414(2) 0.64261(11) -0.04506(10) 0.0325(4) Uani 1 1 d . . . 
C82 C 0.1910(2) 0.59592(11) -0.08455(10) 0.0325(4) Uani 1 1 d . . . 
C83 C 0.0976(3) 0.56448(14) -0.05715(12) 0.0527(7) Uani 1 1 d . . . 
H83A H 0.0653 0.5712 -0.0116 0.063 Uiso 1 1 calc R . . 
C84 C 0.0502(3) 0.52291(17) -0.09581(15) 0.0695(9) Uani 1 1 d . . . 
H84A H -0.0164 0.5026 -0.0769 0.083 Uiso 1 1 calc R . . 
C85 C 0.0991(3) 0.51104(15) -0.16130(14) 0.0614(8) Uani 1 1 d . . . 
H85A H 0.0683 0.4816 -0.1874 0.074 Uiso 1 1 calc R . . 
C86 C 0.1928(3) 0.54196(17) -0.18874(14) 0.0667(8) Uani 1 1 d . . . 
H86A H 0.2272 0.5338 -0.2340 0.080 Uiso 1 1 calc R . . 
C87 C 0.2370(3) 0.58479(15) -0.15094(12) 0.0534(7) Uani 1 1 d . . . 
H87A H 0.3001 0.6070 -0.1707 0.064 Uiso 1 1 calc R . . 
O88 O 0.27816(17) 0.69119(9) -0.06903(8) 0.0468(4) Uani 1 1 d . . . 
C110 C 0.8413(3) 0.89407(13) 0.69436(12) 0.0471(6) Uani 1 1 d . . . 
H11A H 0.8258 0.8615 0.7285 0.071 Uiso 1 1 calc R . . 
H11B H 0.8489 0.9367 0.7149 0.071 Uiso 1 1 calc R . . 
H11C H 0.9213 0.8731 0.6649 0.071 Uiso 1 1 calc R . . 
C131 C 0.8861(3) 0.62033(15) 0.72652(17) 0.0728(9) Uani 1 1 d . . . 
H13A H 0.9472 0.6334 0.7515 0.109 Uiso 1 1 calc R . . 
H13B H 0.9299 0.6033 0.6824 0.109 Uiso 1 1 calc R . . 
H13C H 0.8530 0.5838 0.7491 0.109 Uiso 1 1 calc R . . 
C151 C 0.4226(3) 0.7531(2) 0.79432(13) 0.0730(10) Uani 1 1 d . . . 
H15A H 0.3796 0.7224 0.7746 0.110 Uiso 1 1 calc R . . 
H15B H 0.3704 0.8010 0.7945 0.110 Uiso 1 1 calc R . . 
H15C H 0.4326 0.7397 0.8396 0.110 Uiso 1 1 calc R . . 
C210 C 1.0815(2) 0.67679(13) 0.52962(14) 0.0495(6) Uani 1 1 d . . . 
H21A H 1.0483 0.6793 0.5767 0.074 Uiso 1 1 calc R . . 
H21B H 1.1710 0.6803 0.5234 0.074 Uiso 1 1 calc R . . 
H21C H 1.0781 0.6325 0.5106 0.074 Uiso 1 1 calc R . . 
C231 C 0.7988(3) 0.50584(12) 0.57772(14) 0.0534(7) Uani 1 1 d . . . 
H23A H 0.7396 0.4789 0.5677 0.080 Uiso 1 1 calc R . . 
H23B H 0.7637 0.5321 0.6193 0.080 Uiso 1 1 calc R . . 
H23C H 0.8830 0.4744 0.5816 0.080 Uiso 1 1 calc R . . 
C251 C 0.8501(3) 0.55686(15) 0.33658(14) 0.0621(8) Uani 1 1 d . . . 
H25A H 0.8893 0.5069 0.3320 0.093 Uiso 1 1 calc R . . 
H25B H 0.9043 0.5812 0.3085 0.093 Uiso 1 1 calc R . . 
H25C H 0.7641 0.5672 0.3233 0.093 Uiso 1 1 calc R . . 
C310 C 0.3217(2) 0.84523(13) 0.58958(12) 0.0430(5) Uani 1 1 d . . . 
H31A H 0.3013 0.8010 0.5829 0.065 Uiso 1 1 calc R . . 
H31B H 0.2437 0.8831 0.5899 0.065 Uiso 1 1 calc R . . 
H31C H 0.3539 0.8455 0.6317 0.065 Uiso 1 1 calc R . . 
C331 C 0.4432(3) 0.59476(13) 0.64675(13) 0.0578(7) Uani 1 1 d . . . 
H33A H 0.3539 0.5908 0.6524 0.087 Uiso 1 1 calc R . . 
H33B H 0.4555 0.6213 0.6841 0.087 Uiso 1 1 calc R . . 
H33C H 0.5023 0.5484 0.6445 0.087 Uiso 1 1 calc R . . 
C351 C 0.4759(3) 0.60683(15) 0.39977(14) 0.0598(8) Uani 1 1 d . . . 
H35A H 0.5547 0.5705 0.3848 0.090 Uiso 1 1 calc R . . 
H35B H 0.4651 0.6434 0.3676 0.090 Uiso 1 1 calc R . . 
H35C H 0.4013 0.5870 0.4044 0.090 Uiso 1 1 calc R . . 
C510 C 0.0076(2) 0.69703(14) 0.13423(15) 0.0558(7) Uani 1 1 d . . . 
H51A H 0.0465 0.6613 0.0996 0.084 Uiso 1 1 calc R . . 
H51B H -0.0825 0.6965 0.1485 0.084 Uiso 1 1 calc R . . 
H51C H 0.0555 0.6877 0.1717 0.084 Uiso 1 1 calc R . . 
C531 C 0.2240(3) 0.99644(14) 0.13115(18) 0.0678(9) Uani 1 1 d . . . 
H53A H 0.2342 0.9750 0.1737 0.102 Uiso 0.50 1 calc PR . . 
H53B H 0.1511 1.0377 0.1370 0.102 Uiso 0.50 1 calc PR . . 
H53C H 0.3030 1.0097 0.1134 0.102 Uiso 0.50 1 calc PR . . 
H53D H 0.2247 1.0399 0.1090 0.102 Uiso 0.50 1 calc PR . . 
H53E H 0.3078 0.9772 0.1457 0.102 Uiso 0.50 1 calc PR . . 
H53F H 0.1558 1.0053 0.1693 0.102 Uiso 0.50 1 calc PR . . 
C551 C 0.1404(3) 0.93549(18) -0.09412(14) 0.0710(9) Uani 1 1 d . . . 
H55A H 0.1292 0.9854 -0.0991 0.107 Uiso 1 1 calc R . . 
H55B H 0.0637 0.9227 -0.1045 0.107 Uiso 1 1 calc R . . 
H55C H 0.2164 0.9102 -0.1242 0.107 Uiso 1 1 calc R . . 
C610 C 0.6974(2) 0.64823(13) 0.04908(13) 0.0438(5) Uani 1 1 d . . . 
H61A H 0.7192 0.6906 0.0329 0.066 Uiso 1 1 calc R . . 
H61B H 0.7701 0.6082 0.0349 0.066 Uiso 1 1 calc R . . 
H61C H 0.6792 0.6510 0.0972 0.066 Uiso 1 1 calc R . . 
C631 C 0.4969(3) 0.89944(15) -0.09311(14) 0.0594(8) Uani 1 1 d . . . 
H63A H 0.4207 0.9390 -0.0889 0.089 Uiso 1 1 calc R . . 
H63B H 0.4910 0.8667 -0.1272 0.089 Uiso 1 1 calc R . . 
H63C H 0.5748 0.9158 -0.1053 0.089 Uiso 1 1 calc R . . 
C651 C 0.5794(3) 0.89583(13) 0.14244(14) 0.0536(7) Uani 1 1 d . . . 
H65A H 0.6647 0.9044 0.1302 0.080 Uiso 1 1 calc R . . 
H65B H 0.5812 0.8651 0.1798 0.080 Uiso 1 1 calc R . . 
H65C H 0.5153 0.9399 0.1547 0.080 Uiso 1 1 calc R . . 
C710 C 0.1936(3) 0.59700(14) 0.26199(12) 0.0574(7) Uani 1 1 d . . . 
H71A H 0.2222 0.6236 0.2941 0.086 Uiso 1 1 calc R . . 
H71B H 0.1807 0.5540 0.2815 0.086 Uiso 1 1 calc R . . 
H71C H 0.1122 0.6245 0.2496 0.086 Uiso 1 1 calc R . . 
C731 C 0.6698(3) 0.71539(16) 0.25990(14) 0.0569(7) Uani 1 1 d . . . 
H73A H 0.6983 0.7560 0.2436 0.085 Uiso 1 1 calc R . . 
H73B H 0.7200 0.6743 0.2334 0.085 Uiso 1 1 calc R . . 
H73C H 0.6829 0.7089 0.3059 0.085 Uiso 1 1 calc R . . 
C751 C 0.2114(3) 0.86115(13) 0.30859(14) 0.0597(7) Uani 1 1 d . . . 
H75A H 0.2118 0.8621 0.3562 0.090 Uiso 1 1 calc R . . 
H75B H 0.1253 0.8604 0.2997 0.090 Uiso 1 1 calc R . . 
H75C H 0.2337 0.9025 0.2899 0.090 Uiso 1 1 calc R . . 
O9 O 0.9834(2) 0.75589(15) 0.79989(11) 0.0838(8) Uani 1 1 d U . . 
C91 C 0.9333(4) 0.7743(3) 0.86474(18) 0.1108(17) Uani 1 1 d U . . 
H91A H 0.9975 0.7501 0.8924 0.133 Uiso 1 1 calc R . . 
H91B H 0.9235 0.8246 0.8708 0.133 Uiso 1 1 calc R . . 
C92 C 0.8197(4) 0.7610(4) 0.8876(2) 0.145(2) Uani 1 1 d U . . 
H92A H 0.7933 0.7774 0.9335 0.218 Uiso 1 1 calc R . . 
H92B H 0.8287 0.7111 0.8847 0.218 Uiso 1 1 calc R . . 
H92C H 0.7543 0.7850 0.8612 0.218 Uiso 1 1 calc R . . 
C93 C 1.0956(4) 0.7653(3) 0.77680(19) 0.1119(17) Uani 1 1 d U . . 
H93A H 1.1588 0.7399 0.8044 0.134 Uiso 1 1 calc R . . 
H93B H 1.0907 0.8151 0.7819 0.134 Uiso 1 1 calc R . . 
C94 C 1.1451(3) 0.7443(3) 0.70972(18) 0.1055(16) Uani 1 1 d U . . 
H94A H 1.2292 0.7544 0.6979 0.158 Uiso 1 1 calc R . . 
H94B H 1.0850 0.7697 0.6813 0.158 Uiso 1 1 calc R . . 
H94C H 1.1548 0.6945 0.7040 0.158 Uiso 1 1 calc R . . 
  
loop_ 
 _atom_site_aniso_label 
 _atom_site_aniso_U_11 
 _atom_site_aniso_U_22 
 _atom_site_aniso_U_33 
 _atom_site_aniso_U_23 
 _atom_site_aniso_U_13 
 _atom_site_aniso_U_12 
Mo1 0.02873(9) 0.01989(8) 0.02196(8) 0.00027(6) -0.00291(6) -0.00865(7) 
N1 0.0328(9) 0.0230(8) 0.0247(8) -0.0012(6) -0.0042(7) -0.0107(7) 
Mo2 0.03134(9) 0.02401(9) 0.01976(8) -0.00014(6) -0.00363(6) -0.01076(7) 
N2 0.0303(9) 0.0244(8) 0.0292(8) -0.0019(7) -0.0013(7) -0.0092(7) 
N3 0.0304(8) 0.0186(7) 0.0280(8) 0.0019(6) -0.0050(7) -0.0079(6) 
O4 0.0407(8) 0.0255(7) 0.0284(7) 0.0043(6) -0.0031(6) -0.0134(6) 
N5 0.0304(9) 0.0300(9) 0.0295(9) 0.0017(7) -0.0042(7) -0.0093(7) 
N6 0.0330(9) 0.0237(8) 0.0246(8) -0.0012(6) -0.0027(7) -0.0100(7) 
N7 0.0431(10) 0.0230(8) 0.0223(8) 0.0009(6) -0.0043(7) -0.0144(7) 
O8 0.0434(8) 0.0337(8) 0.0259(7) -0.0026(6) -0.0067(6) -0.0165(7) 
C11 0.0373(11) 0.0311(10) 0.0215(9) 0.0009(8) -0.0069(8) -0.0159(9) 
C12 0.0436(12) 0.0318(11) 0.0327(11) 0.0030(9) -0.0088(9) -0.0134(10) 
C13 0.0688(17) 0.0380(12) 0.0396(13) 0.0109(10) -0.0203(12) -0.0223(12) 
C14 0.0803(19) 0.0580(16) 0.0341(12) 0.0170(11) -0.0213(13) -0.0429(15) 
C15 0.0567(15) 0.0749(18) 0.0227(10) 0.0030(11) -0.0067(10) -0.0429(14) 
C16 0.0394(12) 0.0523(14) 0.0250(10) 0.0010(9) -0.0064(9) -0.0206(11) 
C17 0.0503(13) 0.0273(10) 0.0305(11) -0.0061(8) -0.0053(9) -0.0157(10) 
C18 0.0687(18) 0.0411(14) 0.0517(15) -0.0210(12) 0.0042(13) -0.0146(13) 
C19 0.0689(16) 0.0247(10) 0.0428(13) -0.0001(9) -0.0145(12) -0.0213(11) 
C21 0.0283(10) 0.0223(9) 0.0355(11) -0.0030(8) -0.0038(8) -0.0029(8) 
C22 0.0367(11) 0.0276(10) 0.0352(11) -0.0014(8) -0.0040(9) -0.0075(9) 
C23 0.0358(12) 0.0267(10) 0.0515(14) 0.0015(10) -0.0085(10) -0.0078(9) 
C24 0.0401(13) 0.0236(10) 0.0613(15) -0.0083(10) -0.0113(11) -0.0052(9) 
C25 0.0408(12) 0.0338(11) 0.0428(13) -0.0118(10) -0.0109(10) -0.0007(10) 
C26 0.0386(12) 0.0299(10) 0.0337(11) -0.0037(9) -0.0074(9) -0.0034(9) 
C27 0.0300(11) 0.0359(11) 0.0427(12) -0.0048(9) 0.0017(9) -0.0112(9) 
C28 0.0459(15) 0.0702(18) 0.0494(15) -0.0096(13) 0.0138(12) -0.0252(14) 
C29 0.0342(12) 0.0413(13) 0.0574(15) -0.0055(11) -0.0041(11) -0.0151(10) 
C31 0.0260(9) 0.0214(9) 0.0310(10) 0.0022(7) -0.0040(8) -0.0079(7) 
C32 0.0377(11) 0.0264(10) 0.0293(10) 0.0023(8) -0.0040(8) -0.0082(9) 
C33 0.0404(12) 0.0278(10) 0.0401(12) 0.0058(9) 0.0000(10) -0.0099(9) 
C34 0.0399(12) 0.0246(10) 0.0549(14) 0.0003(10) -0.0010(10) -0.0151(9) 
C35 0.0402(12) 0.0311(11) 0.0399(12) -0.0041(9) -0.0044(10) -0.0137(9) 
C36 0.0364(11) 0.0277(10) 0.0309(10) 0.0014(8) -0.0042(8) -0.0118(9) 
C37 0.0298(10) 0.0245(9) 0.0360(11) 0.0024(8) -0.0092(8) -0.0046(8) 
C38 0.0515(15) 0.0398(13) 0.0457(14) 0.0063(11) -0.0209(11) -0.0016(11) 
C39 0.0393(13) 0.0252(11) 0.0744(18) -0.0020(11) -0.0091(12) -0.0034(10) 
C41 0.0430(12) 0.0307(10) 0.0296(10) -0.0013(8) 0.0010(9) -0.0122(9) 
C42 0.0369(11) 0.0270(10) 0.0292(10) 0.0013(8) 0.0047(9) -0.0050(9) 
C43 0.0412(13) 0.0344(12) 0.0454(13) 0.0050(10) 0.0041(10) -0.0109(10) 
C44 0.0545(16) 0.0417(14) 0.0682(18) 0.0060(13) 0.0157(14) -0.0186(12) 
C45 0.095(2) 0.0419(14) 0.0473(16) 0.0136(12) 0.0204(16) -0.0170(15) 
C46 0.111(3) 0.0558(17) 0.0309(13) 0.0131(12) -0.0020(15) -0.0200(18) 
C47 0.0718(18) 0.0459(14) 0.0320(12) 0.0033(10) -0.0042(12) -0.0183(13) 
O48 0.1009(16) 0.0585(11) 0.0357(9) -0.0014(8) -0.0056(10) -0.0517(11) 
C51 0.0269(10) 0.0308(10) 0.0348(11) 0.0038(8) -0.0053(8) -0.0034(8) 
C52 0.0334(11) 0.0304(11) 0.0405(12) 0.0003(9) -0.0072(9) -0.0047(9) 
C53 0.0368(12) 0.0296(11) 0.0657(16) 0.0000(11) -0.0039(11) -0.0061(10) 
C54 0.0449(14) 0.0347(13) 0.0741(19) 0.0212(13) -0.0003(13) -0.0014(11) 
C55 0.0370(13) 0.0510(15) 0.0471(14) 0.0199(12) -0.0032(11) -0.0018(11) 
C56 0.0366(12) 0.0417(12) 0.0354(12) 0.0054(10) -0.0055(9) -0.0048(10) 
C57 0.0300(11) 0.0457(13) 0.0415(12) -0.0016(10) -0.0016(9) -0.0124(10) 
C58 0.0348(13) 0.0664(18) 0.0567(16) -0.0137(14) 0.0029(11) -0.0092(12) 
C59 0.0384(14) 0.090(2) 0.0575(17) 0.0051(16) -0.0146(12) -0.0260(15) 
C61 0.0275(10) 0.0250(9) 0.0326(10) 0.0008(8) -0.0037(8) -0.0097(8) 
C62 0.0368(11) 0.0335(11) 0.0312(11) 0.0031(9) -0.0038(9) -0.0137(9) 
C63 0.0417(12) 0.0352(11) 0.0422(12) 0.0103(10) -0.0038(10) -0.0158(10) 
C64 0.0386(12) 0.0294(11) 0.0590(15) 0.0059(10) -0.0103(11) -0.0158(10) 
C65 0.0345(11) 0.0289(10) 0.0502(13) -0.0018(9) -0.0135(10) -0.0101(9) 
C66 0.0362(11) 0.0263(10) 0.0341(11) 0.0004(8) -0.0092(9) -0.0076(9) 
C67 0.0359(11) 0.0280(10) 0.0364(11) -0.0059(9) -0.0002(9) -0.0079(9) 
C68 0.0469(14) 0.0262(11) 0.0613(16) -0.0045(11) -0.0026(12) -0.0045(10) 
C69 0.0533(15) 0.0478(14) 0.0373(13) -0.0128(11) 0.0043(11) -0.0076(12) 
C71 0.0439(12) 0.0266(10) 0.0194(9) 0.0019(7) -0.0065(8) -0.0129(9) 
C72 0.0422(12) 0.0333(11) 0.0243(10) 0.0002(8) -0.0058(9) -0.0098(9) 
C73 0.0489(13) 0.0434(12) 0.0257(10) 0.0037(9) -0.0109(9) -0.0185(11) 
C74 0.0630(16) 0.0366(12) 0.0277(11) -0.0009(9) -0.0128(10) -0.0211(11) 
C75 0.0603(15) 0.0287(11) 0.0308(11) -0.0046(9) -0.0082(10) -0.0110(10) 
C76 0.0432(12) 0.0326(11) 0.0296(10) -0.0005(8) -0.0075(9) -0.0098(9) 
C77 0.0631(15) 0.0316(11) 0.0291(11) 0.0054(9) -0.0060(10) -0.0219(11) 
C78 0.0805(19) 0.0341(12) 0.0408(13) 0.0047(10) -0.0105(13) -0.0313(13) 
C79 0.091(2) 0.0349(13) 0.0511(15) 0.0156(11) -0.0248(15) -0.0191(14) 
C81 0.0364(11) 0.0337(11) 0.0285(10) -0.0022(8) -0.0040(9) -0.0113(9) 
C82 0.0395(12) 0.0306(10) 0.0293(10) -0.0003(8) -0.0120(9) -0.0084(9) 
C83 0.0766(19) 0.0614(16) 0.0348(12) 0.0033(11) -0.0142(12) -0.0413(15) 
C84 0.103(3) 0.074(2) 0.0592(18) 0.0118(15) -0.0330(17) -0.063(2) 
C85 0.090(2) 0.0558(16) 0.0523(16) -0.0048(13) -0.0352(16) -0.0301(16) 
C86 0.088(2) 0.084(2) 0.0375(14) -0.0195(14) -0.0118(14) -0.0358(19) 
C87 0.0595(16) 0.0733(19) 0.0341(13) -0.0108(12) -0.0029(11) -0.0313(15) 
O88 0.0659(11) 0.0488(10) 0.0360(9) 0.0056(7) -0.0083(8) -0.0333(9) 
C110 0.0676(17) 0.0435(13) 0.0419(13) -0.0019(11) -0.0191(12) -0.0294(13) 
C131 0.097(2) 0.0449(16) 0.080(2) 0.0254(15) -0.0337(19) -0.0138(16) 
C151 0.074(2) 0.128(3) 0.0365(14) 0.0099(16) -0.0001(14) -0.065(2) 
C210 0.0298(12) 0.0455(14) 0.0688(17) -0.0012(13) -0.0065(11) -0.0021(10) 
C231 0.0616(17) 0.0306(12) 0.0694(18) 0.0104(12) -0.0069(14) -0.0157(12) 
C251 0.083(2) 0.0502(16) 0.0511(16) -0.0208(13) -0.0190(15) -0.0072(15) 
C310 0.0353(12) 0.0411(13) 0.0484(14) 0.0044(11) -0.0022(10) -0.0042(10) 
C331 0.084(2) 0.0367(13) 0.0508(15) 0.0134(11) 0.0052(14) -0.0209(14) 
C351 0.087(2) 0.0540(16) 0.0499(15) -0.0120(13) -0.0096(15) -0.0384(16) 
C510 0.0406(14) 0.0554(16) 0.0716(19) 0.0076(14) 0.0070(13) -0.0215(12) 
C531 0.0660(19) 0.0394(14) 0.101(3) -0.0116(15) -0.0143(18) -0.0184(14) 
C551 0.0664(19) 0.082(2) 0.0545(17) 0.0356(16) -0.0061(15) -0.0029(17) 
C610 0.0329(12) 0.0407(13) 0.0545(15) -0.0087(11) -0.0053(10) -0.0037(10) 
C631 0.080(2) 0.0566(17) 0.0523(16) 0.0244(13) -0.0137(14) -0.0348(16) 
C651 0.0655(17) 0.0334(12) 0.0701(18) -0.0056(12) -0.0319(14) -0.0154(12) 
C710 0.091(2) 0.0517(15) 0.0361(13) 0.0097(11) 0.0045(13) -0.0371(15) 
C731 0.0516(16) 0.0689(18) 0.0573(16) -0.0065(14) -0.0173(13) -0.0228(14) 
C751 0.077(2) 0.0378(13) 0.0598(17) -0.0187(12) -0.0153(15) -0.0027(13) 
O9 0.0483(12) 0.147(2) 0.0560(13) 0.0135(14) -0.0063(10) -0.0250(14) 
C91 0.071(2) 0.208(5) 0.055(2) 0.008(3) -0.0077(18) -0.038(3) 
C92 0.071(3) 0.299(8) 0.076(3) -0.040(4) 0.011(2) -0.077(4) 
C93 0.065(2) 0.213(5) 0.071(2) 0.028(3) -0.0178(19) -0.055(3) 
C94 0.055(2) 0.190(5) 0.065(2) 0.023(3) -0.0015(17) -0.024(3) 
  
_geom_special_details 
; 
 All esds (except the esd in the dihedral angle between two l.s. planes) 
 are estimated using the full covariance matrix.  The cell esds are taken 
 into account individually in the estimation of esds in distances, angles 
 and torsion angles; correlations between esds in cell parameters are only 
 used when they are defined by crystal symmetry.  An approximate (isotropic) 
 treatment of cell esds is used for estimating esds involving l.s. planes. 
; 
  
loop_ 
 _geom_bond_atom_site_label_1 
 _geom_bond_atom_site_label_2 
 _geom_bond_distance 
 _geom_bond_site_symmetry_2 
 _geom_bond_publ_flag 
Mo1 N3 1.9271(16) . ? 
Mo1 N2 1.9408(16) . ? 
Mo1 N1 1.9704(16) . ? 
Mo1 O4 2.0017(13) . ? 
N1 C11 1.446(2) . ? 
N1 C17 1.508(2) . ? 
Mo2 N6 1.9241(16) . ? 
Mo2 N5 1.9362(17) . ? 
Mo2 N7 1.9731(16) . ? 
Mo2 O8 2.0126(14) . ? 
N2 C21 1.437(2) . ? 
N2 C27 1.519(3) . ? 
N3 C31 1.440(2) . ? 
N3 C37 1.513(2) . ? 
O4 C41 1.323(3) . ? 
N5 C51 1.437(3) . ? 
N5 C57 1.518(3) . ? 
N6 C61 1.444(2) . ? 
N6 C67 1.516(3) . ? 
N7 C71 1.445(2) . ? 
N7 C77 1.504(2) . ? 
O8 C81 1.323(2) . ? 
C11 C12 1.384(3) . ? 
C11 C16 1.398(3) . ? 
C12 C13 1.396(3) . ? 
C13 C14 1.380(4) . ? 
C13 C131 1.508(4) . ? 
C14 C15 1.383(4) . ? 
C15 C16 1.394(3) . ? 
C15 C151 1.518(4) . ? 
C17 C19 1.525(3) . ? 
C17 C110 1.532(3) . ? 
C17 C18 1.541(3) . ? 
C21 C22 1.393(3) . ? 
C21 C26 1.400(3) . ? 
C22 C23 1.394(3) . ? 
C23 C24 1.387(3) . ? 
C23 C231 1.507(3) . ? 
C24 C25 1.389(3) . ? 
C25 C26 1.393(3) . ? 
C25 C251 1.510(3) . ? 
C27 C29 1.523(3) . ? 
C27 C210 1.528(3) . ? 
C27 C28 1.533(3) . ? 
C31 C36 1.383(3) . ? 
C31 C32 1.396(3) . ? 
C32 C33 1.392(3) . ? 
C33 C34 1.388(3) . ? 
C33 C331 1.513(3) . ? 
C34 C35 1.386(3) . ? 
C35 C36 1.392(3) . ? 
C35 C351 1.511(3) . ? 
C37 C39 1.524(3) . ? 
C37 C38 1.528(3) . ? 
C37 C310 1.534(3) . ? 
C41 O48 1.212(3) . ? 
C41 C42 1.498(3) . ? 
C42 C43 1.384(3) . ? 
C42 C47 1.390(3) . ? 
C43 C44 1.389(3) . ? 
C44 C45 1.374(4) . ? 
C45 C46 1.377(5) . ? 
C46 C47 1.384(4) . ? 
C51 C52 1.390(3) . ? 
C51 C56 1.396(3) . ? 
C52 C53 1.393(3) . ? 
C53 C54 1.394(4) . ? 
C53 C531 1.502(4) . ? 
C54 C55 1.361(4) . ? 
C55 C56 1.396(3) . ? 
C55 C551 1.533(4) . ? 
C57 C510 1.526(3) . ? 
C57 C59 1.527(3) . ? 
C57 C58 1.528(3) . ? 
C61 C66 1.389(3) . ? 
C61 C62 1.390(3) . ? 
C62 C63 1.393(3) . ? 
C63 C64 1.384(3) . ? 
C63 C631 1.516(3) . ? 
C64 C65 1.386(3) . ? 
C65 C66 1.394(3) . ? 
C65 C651 1.514(3) . ? 
C67 C68 1.526(3) . ? 
C67 C69 1.531(3) . ? 
C67 C610 1.540(3) . ? 
C71 C76 1.388(3) . ? 
C71 C72 1.395(3) . ? 
C72 C73 1.391(3) . ? 
C73 C74 1.392(3) . ? 
C73 C731 1.508(3) . ? 
C74 C75 1.384(3) . ? 
C75 C76 1.402(3) . ? 
C75 C751 1.505(3) . ? 
C77 C78 1.529(3) . ? 
C77 C79 1.533(4) . ? 
C77 C710 1.534(3) . ? 
C81 O88 1.216(2) . ? 
C81 C82 1.492(3) . ? 
C82 C83 1.376(3) . ? 
C82 C87 1.383(3) . ? 
C83 C84 1.389(3) . ? 
C84 C85 1.373(4) . ? 
C85 C86 1.371(4) . ? 
C86 C87 1.375(4) . ? 
O9 C93 1.299(4) . ? 
O9 C91 1.380(4) . ? 
C91 C92 1.343(5) . ? 
C93 C94 1.430(5) . ? 
  
loop_ 
 _geom_angle_atom_site_label_1 
 _geom_angle_atom_site_label_2 
 _geom_angle_atom_site_label_3 
 _geom_angle 
 _geom_angle_site_symmetry_1 
 _geom_angle_site_symmetry_3 
 _geom_angle_publ_flag 
N3 Mo1 N2 114.00(7) . . ? 
N3 Mo1 N1 106.88(7) . . ? 
N2 Mo1 N1 113.49(7) . . ? 
N3 Mo1 O4 107.13(6) . . ? 
N2 Mo1 O4 98.46(6) . . ? 
N1 Mo1 O4 116.84(6) . . ? 
C11 N1 C17 115.09(15) . . ? 
C11 N1 Mo1 111.52(12) . . ? 
C17 N1 Mo1 133.38(13) . . ? 
N6 Mo2 N5 113.97(7) . . ? 
N6 Mo2 N7 106.22(7) . . ? 
N5 Mo2 N7 113.29(7) . . ? 
N6 Mo2 O8 107.45(6) . . ? 
N5 Mo2 O8 99.44(7) . . ? 
N7 Mo2 O8 116.55(6) . . ? 
C21 N2 C27 113.21(16) . . ? 
C21 N2 Mo1 122.85(13) . . ? 
C27 N2 Mo1 123.89(13) . . ? 
C31 N3 C37 113.13(15) . . ? 
C31 N3 Mo1 123.45(12) . . ? 
C37 N3 Mo1 123.39(12) . . ? 
C41 O4 Mo1 124.58(13) . . ? 
C51 N5 C57 112.65(16) . . ? 
C51 N5 Mo2 123.49(13) . . ? 
C57 N5 Mo2 123.73(13) . . ? 
C61 N6 C67 113.66(15) . . ? 
C61 N6 Mo2 122.07(13) . . ? 
C67 N6 Mo2 124.27(12) . . ? 
C71 N7 C77 115.36(15) . . ? 
C71 N7 Mo2 111.29(11) . . ? 
C77 N7 Mo2 133.35(13) . . ? 
C81 O8 Mo2 122.00(13) . . ? 
C12 C11 C16 118.28(19) . . ? 
C12 C11 N1 120.00(18) . . ? 
C16 C11 N1 121.67(19) . . ? 
C11 C12 C13 122.0(2) . . ? 
C14 C13 C12 118.1(2) . . ? 
C14 C13 C131 121.3(2) . . ? 
C12 C13 C131 120.6(3) . . ? 
C13 C14 C15 121.7(2) . . ? 
C14 C15 C16 119.1(2) . . ? 
C14 C15 C151 121.1(2) . . ? 
C16 C15 C151 119.8(3) . . ? 
C15 C16 C11 120.7(2) . . ? 
N1 C17 C19 108.75(16) . . ? 
N1 C17 C110 109.41(18) . . ? 
C19 C17 C110 109.57(19) . . ? 
N1 C17 C18 112.54(18) . . ? 
C19 C17 C18 108.8(2) . . ? 
C110 C17 C18 107.7(2) . . ? 
C22 C21 C26 118.94(19) . . ? 
C22 C21 N2 119.09(18) . . ? 
C26 C21 N2 121.94(18) . . ? 
C21 C22 C23 121.2(2) . . ? 
C24 C23 C22 118.5(2) . . ? 
C24 C23 C231 121.3(2) . . ? 
C22 C23 C231 120.1(2) . . ? 
C23 C24 C25 121.7(2) . . ? 
C24 C25 C26 118.9(2) . . ? 
C24 C25 C251 120.4(2) . . ? 
C26 C25 C251 120.6(2) . . ? 
C25 C26 C21 120.6(2) . . ? 
N2 C27 C29 108.30(17) . . ? 
N2 C27 C210 111.10(18) . . ? 
C29 C27 C210 109.1(2) . . ? 
N2 C27 C28 110.48(19) . . ? 
C29 C27 C28 108.3(2) . . ? 
C210 C27 C28 109.5(2) . . ? 
C36 C31 C32 119.52(18) . . ? 
C36 C31 N3 120.70(17) . . ? 
C32 C31 N3 119.68(17) . . ? 
C33 C32 C31 120.6(2) . . ? 
C34 C33 C32 118.6(2) . . ? 
C34 C33 C331 121.0(2) . . ? 
C32 C33 C331 120.4(2) . . ? 
C35 C34 C33 121.64(19) . . ? 
C34 C35 C36 118.9(2) . . ? 
C34 C35 C351 121.4(2) . . ? 
C36 C35 C351 119.7(2) . . ? 
C31 C36 C35 120.68(19) . . ? 
N3 C37 C39 108.38(16) . . ? 
N3 C37 C38 110.62(17) . . ? 
C39 C37 C38 108.78(19) . . ? 
N3 C37 C310 111.24(16) . . ? 
C39 C37 C310 109.29(19) . . ? 
C38 C37 C310 108.50(19) . . ? 
O48 C41 O4 124.3(2) . . ? 
O48 C41 C42 122.3(2) . . ? 
O4 C41 C42 113.38(18) . . ? 
C43 C42 C47 120.0(2) . . ? 
C43 C42 C41 121.2(2) . . ? 
C47 C42 C41 118.8(2) . . ? 
C42 C43 C44 119.6(2) . . ? 
C45 C44 C43 120.2(3) . . ? 
C44 C45 C46 120.3(2) . . ? 
C45 C46 C47 120.1(3) . . ? 
C46 C47 C42 119.7(3) . . ? 
C52 C51 C56 119.3(2) . . ? 
C52 C51 N5 120.15(18) . . ? 
C56 C51 N5 120.5(2) . . ? 
C51 C52 C53 120.8(2) . . ? 
C52 C53 C54 118.1(2) . . ? 
C52 C53 C531 120.2(3) . . ? 
C54 C53 C531 121.7(2) . . ? 
C55 C54 C53 122.3(2) . . ? 
C54 C55 C56 119.3(2) . . ? 
C54 C55 C551 122.1(3) . . ? 
C56 C55 C551 118.6(3) . . ? 
C55 C56 C51 120.1(2) . . ? 
N5 C57 C510 108.30(18) . . ? 
N5 C57 C59 110.64(19) . . ? 
C510 C57 C59 108.3(2) . . ? 
N5 C57 C58 111.03(19) . . ? 
C510 C57 C58 109.3(2) . . ? 
C59 C57 C58 109.2(2) . . ? 
C66 C61 C62 119.48(18) . . ? 
C66 C61 N6 119.75(18) . . ? 
C62 C61 N6 120.73(18) . . ? 
C61 C62 C63 120.3(2) . . ? 
C64 C63 C62 119.1(2) . . ? 
C64 C63 C631 120.7(2) . . ? 
C62 C63 C631 120.2(2) . . ? 
C63 C64 C65 121.7(2) . . ? 
C64 C65 C66 118.5(2) . . ? 
C64 C65 C651 121.4(2) . . ? 
C66 C65 C651 120.1(2) . . ? 
C61 C66 C65 120.9(2) . . ? 
N6 C67 C68 108.18(17) . . ? 
N6 C67 C69 110.26(18) . . ? 
C68 C67 C69 108.83(19) . . ? 
N6 C67 C610 111.58(17) . . ? 
C68 C67 C610 109.0(2) . . ? 
C69 C67 C610 108.93(19) . . ? 
C76 C71 C72 118.15(19) . . ? 
C76 C71 N7 120.43(19) . . ? 
C72 C71 N7 121.29(18) . . ? 
C73 C72 C71 121.8(2) . . ? 
C72 C73 C74 118.4(2) . . ? 
C72 C73 C731 121.0(2) . . ? 
C74 C73 C731 120.5(2) . . ? 
C75 C74 C73 121.6(2) . . ? 
C74 C75 C76 118.5(2) . . ? 
C74 C75 C751 121.5(2) . . ? 
C76 C75 C751 120.0(2) . . ? 
C71 C76 C75 121.5(2) . . ? 
N7 C77 C78 108.54(17) . . ? 
N7 C77 C79 112.23(19) . . ? 
C78 C77 C79 108.3(2) . . ? 
N7 C77 C710 109.88(18) . . ? 
C78 C77 C710 110.0(2) . . ? 
C79 C77 C710 107.9(2) . . ? 
O88 C81 O8 123.88(19) . . ? 
O88 C81 C82 122.04(19) . . ? 
O8 C81 C82 114.08(17) . . ? 
C83 C82 C87 118.7(2) . . ? 
C83 C82 C81 121.9(2) . . ? 
C87 C82 C81 119.4(2) . . ? 
C82 C83 C84 120.3(2) . . ? 
C85 C84 C83 120.3(3) . . ? 
C86 C85 C84 119.6(2) . . ? 
C85 C86 C87 120.2(3) . . ? 
C86 C87 C82 120.9(3) . . ? 
C93 O9 C91 118.8(3) . . ? 
C92 C91 O9 117.1(4) . . ? 
O9 C93 C94 117.0(4) . . ? 
  
_diffrn_measured_fraction_theta_max    0.990 
_diffrn_reflns_theta_full              27.88 
_diffrn_measured_fraction_theta_full   0.990 
_refine_diff_density_max    0.748 
_refine_diff_density_min   -0.398 
_refine_diff_density_rms    0.062 


  
data_05008 
  
_audit_creation_method            SHELXL-97 
_chemical_name_systematic 
; 
 ? 
; 
_chemical_name_common             'fluorinated thio ketimide'
_chemical_melting_point           ? 
_chemical_formula_moiety          ? 
_chemical_formula_sum 
 'C49 H59 F5 Mo N4 S' 
_chemical_formula_weight          927.00 
  
loop_ 
 _atom_type_symbol 
 _atom_type_description 
 _atom_type_scat_dispersion_real 
 _atom_type_scat_dispersion_imag 
 _atom_type_scat_source 
 'C'  'C'   0.0033   0.0016 
 'International Tables Vol C Tables 4.2.6.8 and 6.1.1.4' 
 'H'  'H'   0.0000   0.0000 
 'International Tables Vol C Tables 4.2.6.8 and 6.1.1.4' 
 'N'  'N'   0.0061   0.0033 
 'International Tables Vol C Tables 4.2.6.8 and 6.1.1.4' 
 'F'  'F'   0.0171   0.0103 
 'International Tables Vol C Tables 4.2.6.8 and 6.1.1.4' 
 'S'  'S'   0.1246   0.1234 
 'International Tables Vol C Tables 4.2.6.8 and 6.1.1.4' 
 'Mo'  'Mo'  -1.6832   0.6857 
 'International Tables Vol C Tables 4.2.6.8 and 6.1.1.4' 
  
_symmetry_cell_setting            Triclinic 
_symmetry_space_group_name_H-M    P-1 
  
loop_ 
 _symmetry_equiv_pos_as_xyz 
 'x, y, z' 
 '-x, -y, -z' 
  
_cell_length_a                    10.6395(10) 
_cell_length_b                    12.8842(14) 
_cell_length_c                    18.843(2) 
_cell_angle_alpha                 70.329(4) 
_cell_angle_beta                  74.155(3) 
_cell_angle_gamma                 76.599(3) 
_cell_volume                      2311.8(4) 
_cell_formula_units_Z             2 
_cell_measurement_temperature     100(2) 
_cell_measurement_reflns_used     6896 
_cell_measurement_theta_min       0.00 
_cell_measurement_theta_max       0.00 
  
_exptl_crystal_description        plate 
_exptl_crystal_colour             brown 
_exptl_crystal_size_max           0.24 
_exptl_crystal_size_mid           0.15 
_exptl_crystal_size_min           0.05 
_exptl_crystal_density_meas       ? 
_exptl_crystal_density_diffrn     1.332 
_exptl_crystal_density_method     'not measured' 
_exptl_crystal_F_000              968 
_exptl_absorpt_coefficient_mu     0.387 
_exptl_absorpt_correction_type    multi-scan 
_exptl_absorpt_correction_T_min   0.9129 
_exptl_absorpt_correction_T_max   0.9809 
_exptl_absorpt_process_details    sadabs 
  
_exptl_special_details 
; 
 'Siemens three-circle diffractometer, Bruker APEX CCD' 
; 
  
_diffrn_ambient_temperature       100(2) 
_diffrn_radiation_wavelength      0.71073 
_diffrn_radiation_type            MoK\a 
_diffrn_radiation_source          'fine-focus sealed tube' 
_diffrn_radiation_monochromator   graphite 
_diffrn_measurement_device_type   'Bruker Smart APEX CCD' 
_diffrn_measurement_method        'omega and phi scans' 
_diffrn_detector_area_resol_mean  ? 
_diffrn_standards_number          ? 
_diffrn_standards_interval_count  ? 
_diffrn_standards_interval_time   ? 
_diffrn_standards_decay_%         ? 
_diffrn_reflns_number             47824 
_diffrn_reflns_av_R_equivalents   0.0433 
_diffrn_reflns_av_sigmaI/netI     0.0363 
_diffrn_reflns_limit_h_min        -13 
_diffrn_reflns_limit_h_max        14 
_diffrn_reflns_limit_k_min        -15 
_diffrn_reflns_limit_k_max        17 
_diffrn_reflns_limit_l_min        0 
_diffrn_reflns_limit_l_max        25 
_diffrn_reflns_theta_min          1.17 
_diffrn_reflns_theta_max          28.28 
_reflns_number_total              11462 
_reflns_number_gt                 10018 
_reflns_threshold_expression      >2sigma(I) 
  
_computing_data_collection        'SMART 5 (Bruker-AXS, 2003)' 
_computing_cell_refinement        'SAINT 5 (Bruker-AXS, 2003)' 
_computing_data_reduction         'SAINT 5 (Bruker-AXS, 2003)' 
_computing_structure_solution     'SHELXS-97 (Sheldrick, 1990)' 
_computing_structure_refinement   'SHELXL-97 (Sheldrick, 1997)' 
_computing_molecular_graphics     'Bruker SHELXTL' 
_computing_publication_material   'Bruker SHELXTL' 
  
_refine_special_details 
; 
 Refinement of F^2^ against ALL reflections.  The weighted R-factor wR and 
 goodness of fit S are based on F^2^, conventional R-factors R are based 
 on F, with F set to zero for negative F^2^. The threshold expression of 
 F^2^ > 2sigma(F^2^) is used only for calculating R-factors(gt) etc. and is 
 not relevant to the choice of reflections for refinement.  R-factors based 
 on F^2^ are statistically about twice as large as those based on F, and R- 
 factors based on ALL data will be even larger. 
; 
  
_refine_ls_structure_factor_coef  Fsqd 
_refine_ls_matrix_type            full 
_refine_ls_weighting_scheme       calc 
_refine_ls_weighting_details 
 'calc w=1/[\s^2^(Fo^2^)+(0.0452P)^2^+1.3579P] where P=(Fo^2^+2Fc^2^)/3' 
_atom_sites_solution_primary      patterson
_atom_sites_solution_secondary    difmap 
_atom_sites_solution_hydrogens    geom 
_refine_ls_hydrogen_treatment     riding
_refine_ls_extinction_method      none 
_refine_ls_extinction_coef        ? 
_refine_ls_number_reflns          11462 
_refine_ls_number_parameters      547 
_refine_ls_number_restraints      0 
_refine_ls_R_factor_all           0.0455 
_refine_ls_R_factor_gt            0.0371 
_refine_ls_wR_factor_ref          0.0917 
_refine_ls_wR_factor_gt           0.0865 
_refine_ls_goodness_of_fit_ref    1.057 
_refine_ls_restrained_S_all       1.057 
_refine_ls_shift/su_max           0.029 
_refine_ls_shift/su_mean          0.000 
  
loop_ 
 _atom_site_label 
 _atom_site_type_symbol 
 _atom_site_fract_x 
 _atom_site_fract_y 
 _atom_site_fract_z 
 _atom_site_U_iso_or_equiv 
 _atom_site_adp_type 
 _atom_site_occupancy 
 _atom_site_symmetry_multiplicity 
 _atom_site_calc_flag 
 _atom_site_refinement_flags 
 _atom_site_disorder_assembly 
 _atom_site_disorder_group 
Mo1 Mo 0.593939(15) 0.727415(13) 0.703193(9) 0.01183(5) Uani 1 1 d . . . 
N1 N 0.74925(15) 0.75096(13) 0.61693(9) 0.0157(3) Uani 1 1 d . . . 
N2 N 0.64816(15) 0.65509(13) 0.80108(9) 0.0150(3) Uani 1 1 d . . . 
N3 N 0.44442(15) 0.67004(13) 0.69291(9) 0.0140(3) Uani 1 1 d . . . 
N4 N 0.52942(15) 0.86677(13) 0.71108(9) 0.0146(3) Uani 1 1 d . . . 
S5 S 0.29026(5) 0.97839(4) 0.69426(3) 0.01841(10) Uani 1 1 d . . . 
C11 C 0.82328(18) 0.64452(16) 0.61061(11) 0.0163(4) Uani 1 1 d . . . 
C12 C 0.93297(19) 0.59478(17) 0.64420(12) 0.0187(4) Uani 1 1 d . . . 
H12 H 0.9650 0.6349 0.6679 0.022 Uiso 1 1 calc R . . 
C13 C 0.99625(19) 0.48717(17) 0.64359(12) 0.0215(4) Uani 1 1 d . . . 
C14 C 0.9481(2) 0.42942(17) 0.60878(12) 0.0224(4) Uani 1 1 d . . . 
H14 H 0.9893 0.3555 0.6093 0.027 Uiso 1 1 calc R . . 
C15 C 0.8413(2) 0.47719(18) 0.57328(12) 0.0216(4) Uani 1 1 d . . . 
C16 C 0.78121(19) 0.58560(17) 0.57384(11) 0.0189(4) Uani 1 1 d . . . 
H16 H 0.7098 0.6200 0.5485 0.023 Uiso 1 1 calc R . . 
C17 C 0.8168(2) 0.85258(17) 0.57351(12) 0.0212(4) Uani 1 1 d . . . 
C18 C 0.8730(2) 0.88747(19) 0.62732(14) 0.0292(5) Uani 1 1 d . . . 
H18A H 0.8015 0.9026 0.6698 0.044 Uiso 1 1 calc R . . 
H18B H 0.9130 0.9549 0.5984 0.044 Uiso 1 1 calc R . . 
H18C H 0.9402 0.8272 0.6482 0.044 Uiso 1 1 calc R . . 
C19 C 0.9281(2) 0.82874(19) 0.50706(14) 0.0322(5) Uani 1 1 d . . . 
H19A H 0.9941 0.7670 0.5278 0.048 Uiso 1 1 calc R . . 
H19B H 0.9700 0.8955 0.4789 0.048 Uiso 1 1 calc R . . 
H19C H 0.8915 0.8085 0.4720 0.048 Uiso 1 1 calc R . . 
C21 C 0.6649(2) 0.72127(16) 0.84529(12) 0.0178(4) Uani 1 1 d . . . 
C22 C 0.7841(2) 0.76113(17) 0.82862(13) 0.0236(4) Uani 1 1 d . . . 
H22 H 0.8548 0.7421 0.7895 0.028 Uiso 1 1 calc R . . 
C23 C 0.8007(2) 0.82849(18) 0.86867(15) 0.0299(5) Uani 1 1 d . . . 
C24 C 0.6982(3) 0.85183(19) 0.92779(15) 0.0330(6) Uani 1 1 d . . . 
H24 H 0.7100 0.8959 0.9563 0.040 Uiso 1 1 calc R . . 
C25 C 0.5785(3) 0.81219(18) 0.94625(13) 0.0291(5) Uani 1 1 d . . . 
C26 C 0.5625(2) 0.74814(17) 0.90344(12) 0.0220(4) Uani 1 1 d . . . 
H26 H 0.4805 0.7225 0.9142 0.026 Uiso 1 1 calc R . . 
C27 C 0.68557(19) 0.53048(16) 0.83579(11) 0.0163(4) Uani 1 1 d . . . 
C28 C 0.8265(2) 0.50192(17) 0.85025(12) 0.0210(4) Uani 1 1 d . . . 
H28A H 0.8892 0.5265 0.8013 0.031 Uiso 1 1 calc R . . 
H28B H 0.8481 0.4211 0.8724 0.031 Uiso 1 1 calc R . . 
H28C H 0.8321 0.5399 0.8862 0.031 Uiso 1 1 calc R . . 
C29 C 0.67740(19) 0.46811(16) 0.78121(11) 0.0171(4) Uani 1 1 d . . . 
H29A H 0.5878 0.4859 0.7715 0.026 Uiso 1 1 calc R . . 
H29B H 0.6984 0.3876 0.8049 0.026 Uiso 1 1 calc R . . 
H29C H 0.7408 0.4909 0.7323 0.026 Uiso 1 1 calc R . . 
C31 C 0.36144(18) 0.61635(16) 0.76409(11) 0.0161(4) Uani 1 1 d . . . 
C32 C 0.30158(19) 0.67387(17) 0.81871(12) 0.0187(4) Uani 1 1 d . . . 
H32 H 0.3140 0.7488 0.8076 0.022 Uiso 1 1 calc R . . 
C33 C 0.2237(2) 0.62299(19) 0.88945(12) 0.0225(4) Uani 1 1 d . . . 
C34 C 0.2043(2) 0.51372(19) 0.90463(12) 0.0250(5) Uani 1 1 d . . . 
H34 H 0.1506 0.4790 0.9524 0.030 Uiso 1 1 calc R . . 
C35 C 0.2622(2) 0.45423(18) 0.85115(13) 0.0225(4) Uani 1 1 d . . . 
C36 C 0.34093(19) 0.50594(17) 0.78120(12) 0.0189(4) Uani 1 1 d . . . 
H36 H 0.3813 0.4658 0.7446 0.023 Uiso 1 1 calc R . . 
C37 C 0.39311(19) 0.69568(16) 0.62061(11) 0.0166(4) Uani 1 1 d . . . 
C38 C 0.4259(2) 0.59282(17) 0.59078(12) 0.0218(4) Uani 1 1 d . . . 
H38A H 0.3834 0.5318 0.6300 0.033 Uiso 1 1 calc R . . 
H38B H 0.5219 0.5695 0.5799 0.033 Uiso 1 1 calc R . . 
H38C H 0.3932 0.6118 0.5434 0.033 Uiso 1 1 calc R . . 
C39 C 0.4586(2) 0.79114(17) 0.55925(12) 0.0195(4) Uani 1 1 d . . . 
H39A H 0.5547 0.7683 0.5484 0.029 Uiso 1 1 calc R . . 
H39B H 0.4371 0.8567 0.5781 0.029 Uiso 1 1 calc R . . 
H39C H 0.4259 0.8096 0.5119 0.029 Uiso 1 1 calc R . . 
C41 C 0.45449(19) 0.96315(16) 0.70762(11) 0.0165(4) Uani 1 1 d . . . 
C42 C 0.4996(2) 1.06013(16) 0.71166(12) 0.0187(4) Uani 1 1 d . . . 
C43 C 0.4497(2) 1.16985(17) 0.67353(13) 0.0248(4) Uani 1 1 d . . . 
H43 H 0.3825 1.1829 0.6457 0.030 Uiso 1 1 calc R . . 
C44 C 0.4982(2) 1.25943(19) 0.67633(15) 0.0320(5) Uani 1 1 d . . . 
H44 H 0.4651 1.3333 0.6495 0.038 Uiso 1 1 calc R . . 
C45 C 0.5936(3) 1.2423(2) 0.71756(15) 0.0347(6) Uani 1 1 d . . . 
H45 H 0.6262 1.3040 0.7192 0.042 Uiso 1 1 calc R . . 
C46 C 0.6419(3) 1.1342(2) 0.75690(16) 0.0348(6) Uani 1 1 d . . . 
H46 H 0.7070 1.1221 0.7859 0.042 Uiso 1 1 calc R . . 
C47 C 0.5954(2) 1.04379(19) 0.75396(14) 0.0274(5) Uani 1 1 d . . . 
H47 H 0.6291 0.9703 0.7809 0.033 Uiso 1 1 calc R . . 
C51 C 0.19260(19) 1.03648(16) 0.76829(12) 0.0181(4) Uani 1 1 d . . . 
C52 C 0.0816(2) 1.11535(17) 0.75318(13) 0.0221(4) Uani 1 1 d . . . 
C53 C -0.0012(2) 1.16317(18) 0.80811(14) 0.0268(5) Uani 1 1 d . . . 
C54 C 0.0258(2) 1.13491(19) 0.88006(14) 0.0286(5) Uani 1 1 d . . . 
C55 C 0.1347(2) 1.05711(19) 0.89717(13) 0.0265(5) Uani 1 1 d . . . 
C56 C 0.2151(2) 1.00791(17) 0.84215(13) 0.0217(4) Uani 1 1 d . . . 
C110 C 0.7157(2) 0.94848(18) 0.53878(13) 0.0258(5) Uani 1 1 d . . . 
H11A H 0.6432 0.9655 0.5802 0.039 Uiso 1 1 calc R . . 
H11B H 0.6806 0.9268 0.5037 0.039 Uiso 1 1 calc R . . 
H11C H 0.7585 1.0146 0.5101 0.039 Uiso 1 1 calc R . . 
C131 C 1.1115(2) 0.43231(19) 0.68240(15) 0.0299(5) Uani 1 1 d . . . 
H13A H 1.1400 0.4874 0.6976 0.045 Uiso 1 1 calc R . . 
H13B H 1.1849 0.4026 0.6465 0.045 Uiso 1 1 calc R . . 
H13C H 1.0846 0.3713 0.7283 0.045 Uiso 1 1 calc R . . 
C151 C 0.7907(2) 0.4136(2) 0.53571(14) 0.0293(5) Uani 1 1 d . . . 
H15A H 0.8579 0.4007 0.4910 0.044 Uiso 1 1 calc R . . 
H15B H 0.7098 0.4570 0.5189 0.044 Uiso 1 1 calc R . . 
H15C H 0.7714 0.3419 0.5728 0.044 Uiso 1 1 calc R . . 
C210 C 0.5879(2) 0.49202(17) 0.91245(12) 0.0208(4) Uani 1 1 d . . . 
H21A H 0.4978 0.5102 0.9035 0.031 Uiso 1 1 calc R . . 
H21B H 0.5939 0.5300 0.9483 0.031 Uiso 1 1 calc R . . 
H21C H 0.6096 0.4112 0.9346 0.031 Uiso 1 1 calc R . . 
C231 C 0.9258(3) 0.8796(2) 0.84397(19) 0.0445(7) Uani 1 1 d . . . 
H23A H 0.9177 0.9475 0.8007 0.067 Uiso 1 1 calc R . . 
H23B H 1.0012 0.8261 0.8279 0.067 Uiso 1 1 calc R . . 
H23C H 0.9397 0.8983 0.8873 0.067 Uiso 1 1 calc R . . 
C251 C 0.4674(3) 0.8375(2) 1.01137(16) 0.0434(7) Uani 1 1 d . . . 
H25A H 0.3823 0.8362 1.0012 0.065 Uiso 1 1 calc R . . 
H25B H 0.4688 0.9115 1.0147 0.065 Uiso 1 1 calc R . . 
H25C H 0.4794 0.7812 1.0602 0.065 Uiso 1 1 calc R . . 
C310 C 0.2428(2) 0.73377(18) 0.63603(13) 0.0225(4) Uani 1 1 d . . . 
H31A H 0.1988 0.6734 0.6750 0.034 Uiso 1 1 calc R . . 
H31B H 0.2116 0.7528 0.5881 0.034 Uiso 1 1 calc R . . 
H31C H 0.2220 0.7994 0.6548 0.034 Uiso 1 1 calc R . . 
C331 C 0.1635(2) 0.6858(2) 0.94868(13) 0.0309(5) Uani 1 1 d . . . 
H33A H 0.0736 0.6696 0.9736 0.046 Uiso 1 1 calc R . . 
H33B H 0.1605 0.7661 0.9232 0.046 Uiso 1 1 calc R . . 
H33C H 0.2175 0.6624 0.9876 0.046 Uiso 1 1 calc R . . 
C351 C 0.2396(3) 0.3356(2) 0.86897(14) 0.0335(5) Uani 1 1 d . . . 
H35A H 0.2540 0.2929 0.9208 0.050 Uiso 1 1 calc R . . 
H35B H 0.3016 0.3013 0.8311 0.050 Uiso 1 1 calc R . . 
H35C H 0.1487 0.3358 0.8666 0.050 Uiso 1 1 calc R . . 
F521 F 0.05129(13) 1.14519(11) 0.68362(8) 0.0302(3) Uani 1 1 d . . . 
F531 F -0.10833(13) 1.23803(12) 0.79122(9) 0.0392(4) Uani 1 1 d . . . 
F541 F -0.05322(15) 1.18243(13) 0.93330(9) 0.0423(4) Uani 1 1 d . . . 
F551 F 0.16088(16) 1.02792(13) 0.96764(8) 0.0394(4) Uani 1 1 d . . . 
F561 F 0.31679(13) 0.92913(11) 0.86283(7) 0.0286(3) Uani 1 1 d . . . 
  
loop_ 
 _atom_site_aniso_label 
 _atom_site_aniso_U_11 
 _atom_site_aniso_U_22 
 _atom_site_aniso_U_33 
 _atom_site_aniso_U_23 
 _atom_site_aniso_U_13 
 _atom_site_aniso_U_12 
Mo1 0.01112(8) 0.01014(8) 0.01359(8) -0.00298(6) -0.00313(5) -0.00057(5) 
N1 0.0145(7) 0.0124(8) 0.0168(8) -0.0017(6) -0.0018(6) -0.0012(6) 
N2 0.0162(7) 0.0125(7) 0.0164(8) -0.0032(6) -0.0051(6) -0.0022(6) 
N3 0.0128(7) 0.0137(7) 0.0151(8) -0.0036(6) -0.0038(6) -0.0013(6) 
N4 0.0149(7) 0.0141(8) 0.0146(8) -0.0034(6) -0.0040(6) -0.0018(6) 
S5 0.0176(2) 0.0174(2) 0.0213(2) -0.00870(19) -0.00673(18) 0.00279(18) 
C11 0.0140(8) 0.0143(9) 0.0139(9) -0.0002(7) 0.0020(7) -0.0012(7) 
C12 0.0154(9) 0.0168(9) 0.0207(10) -0.0020(8) -0.0020(7) -0.0040(7) 
C13 0.0143(9) 0.0182(10) 0.0235(11) -0.0001(8) 0.0010(8) -0.0012(7) 
C14 0.0196(9) 0.0160(10) 0.0240(11) -0.0043(8) 0.0030(8) 0.0005(8) 
C15 0.0208(10) 0.0220(10) 0.0191(10) -0.0075(8) 0.0020(8) -0.0027(8) 
C16 0.0168(9) 0.0212(10) 0.0153(9) -0.0041(8) -0.0010(7) -0.0012(7) 
C17 0.0187(9) 0.0142(9) 0.0233(11) 0.0014(8) -0.0006(8) -0.0035(7) 
C18 0.0286(11) 0.0196(11) 0.0381(13) 0.0011(10) -0.0113(10) -0.0104(9) 
C19 0.0287(12) 0.0205(11) 0.0309(13) 0.0027(9) 0.0066(10) -0.0028(9) 
C21 0.0244(10) 0.0125(9) 0.0179(10) -0.0017(7) -0.0105(8) -0.0023(7) 
C22 0.0261(11) 0.0189(10) 0.0278(11) -0.0027(9) -0.0140(9) -0.0035(8) 
C23 0.0393(13) 0.0176(10) 0.0395(14) -0.0005(10) -0.0275(11) -0.0062(9) 
C24 0.0565(16) 0.0191(11) 0.0347(13) -0.0078(10) -0.0293(12) -0.0041(10) 
C25 0.0487(14) 0.0181(10) 0.0224(11) -0.0059(9) -0.0155(10) 0.0004(10) 
C26 0.0297(11) 0.0157(10) 0.0218(10) -0.0048(8) -0.0095(8) -0.0020(8) 
C27 0.0186(9) 0.0113(9) 0.0166(9) -0.0008(7) -0.0050(7) -0.0008(7) 
C28 0.0200(9) 0.0186(10) 0.0228(10) -0.0033(8) -0.0089(8) 0.0007(8) 
C29 0.0164(9) 0.0140(9) 0.0200(10) -0.0039(8) -0.0051(7) -0.0005(7) 
C31 0.0129(8) 0.0178(9) 0.0168(9) -0.0028(7) -0.0053(7) -0.0014(7) 
C32 0.0156(9) 0.0177(10) 0.0212(10) -0.0055(8) -0.0049(7) 0.0012(7) 
C33 0.0181(9) 0.0275(11) 0.0180(10) -0.0046(8) -0.0048(8) 0.0016(8) 
C34 0.0194(10) 0.0310(12) 0.0185(10) 0.0008(9) -0.0018(8) -0.0069(8) 
C35 0.0223(10) 0.0213(10) 0.0234(11) -0.0006(8) -0.0076(8) -0.0082(8) 
C36 0.0178(9) 0.0204(10) 0.0196(10) -0.0054(8) -0.0057(8) -0.0038(7) 
C37 0.0177(9) 0.0162(9) 0.0167(9) -0.0039(7) -0.0065(7) -0.0022(7) 
C38 0.0267(10) 0.0214(10) 0.0194(10) -0.0074(8) -0.0054(8) -0.0052(8) 
C39 0.0214(10) 0.0183(10) 0.0182(10) -0.0028(8) -0.0077(8) -0.0020(8) 
C41 0.0171(9) 0.0142(9) 0.0172(9) -0.0043(7) -0.0044(7) -0.0002(7) 
C42 0.0206(9) 0.0145(9) 0.0201(10) -0.0070(8) -0.0006(8) -0.0026(7) 
C43 0.0283(11) 0.0158(10) 0.0278(11) -0.0060(9) -0.0046(9) -0.0011(8) 
C44 0.0394(13) 0.0149(10) 0.0375(14) -0.0086(10) -0.0015(11) -0.0027(9) 
C45 0.0437(14) 0.0243(12) 0.0417(15) -0.0167(11) -0.0012(11) -0.0145(11) 
C46 0.0402(14) 0.0328(13) 0.0416(15) -0.0156(11) -0.0140(11) -0.0115(11) 
C47 0.0314(12) 0.0219(11) 0.0324(12) -0.0085(9) -0.0101(10) -0.0058(9) 
C51 0.0177(9) 0.0137(9) 0.0225(10) -0.0070(8) -0.0019(8) -0.0018(7) 
C52 0.0197(10) 0.0174(10) 0.0274(11) -0.0061(8) -0.0024(8) -0.0031(8) 
C53 0.0178(10) 0.0179(10) 0.0394(13) -0.0101(9) 0.0037(9) -0.0018(8) 
C54 0.0277(11) 0.0218(11) 0.0351(13) -0.0169(10) 0.0100(9) -0.0083(9) 
C55 0.0326(12) 0.0275(12) 0.0220(11) -0.0107(9) 0.0005(9) -0.0120(9) 
C56 0.0213(10) 0.0185(10) 0.0253(11) -0.0071(8) -0.0036(8) -0.0037(8) 
C110 0.0237(10) 0.0169(10) 0.0271(11) 0.0032(9) -0.0028(9) -0.0021(8) 
C131 0.0211(10) 0.0198(11) 0.0436(14) -0.0009(10) -0.0119(10) 0.0003(8) 
C151 0.0311(12) 0.0284(12) 0.0314(12) -0.0170(10) -0.0023(10) -0.0028(9) 
C210 0.0242(10) 0.0169(10) 0.0172(10) -0.0024(8) -0.0012(8) -0.0032(8) 
C231 0.0466(16) 0.0311(14) 0.068(2) -0.0075(13) -0.0330(15) -0.0150(12) 
C251 0.070(2) 0.0338(14) 0.0313(14) -0.0199(12) -0.0117(13) 0.0005(13) 
C310 0.0176(9) 0.0243(11) 0.0264(11) -0.0057(9) -0.0093(8) -0.0017(8) 
C331 0.0321(12) 0.0339(13) 0.0187(11) -0.0066(9) -0.0013(9) 0.0036(10) 
C351 0.0434(14) 0.0263(12) 0.0297(13) 0.0021(10) -0.0070(11) -0.0194(11) 
F521 0.0250(6) 0.0285(7) 0.0315(7) -0.0056(6) -0.0106(6) 0.0070(5) 
F531 0.0233(7) 0.0278(7) 0.0565(10) -0.0145(7) -0.0001(6) 0.0086(6) 
F541 0.0429(9) 0.0378(8) 0.0444(9) -0.0277(7) 0.0158(7) -0.0092(7) 
F551 0.0509(9) 0.0495(9) 0.0238(7) -0.0186(7) -0.0028(6) -0.0135(7) 
F561 0.0303(7) 0.0301(7) 0.0234(7) -0.0070(6) -0.0104(5) 0.0033(6) 
  
_geom_special_details 
; 
 All esds (except the esd in the dihedral angle between two l.s. planes) 
 are estimated using the full covariance matrix.  The cell esds are taken 
 into account individually in the estimation of esds in distances, angles 
 and torsion angles; correlations between esds in cell parameters are only 
 used when they are defined by crystal symmetry.  An approximate (isotropic) 
 treatment of cell esds is used for estimating esds involving l.s. planes. 
; 
  
loop_ 
 _geom_bond_atom_site_label_1 
 _geom_bond_atom_site_label_2 
 _geom_bond_distance 
 _geom_bond_site_symmetry_2 
 _geom_bond_publ_flag 
Mo1 N4 1.8082(16) . ? 
Mo1 N2 1.9437(16) . ? 
Mo1 N1 1.9745(16) . ? 
Mo1 N3 1.9811(15) . ? 
N1 C11 1.440(2) . ? 
N1 C17 1.515(2) . ? 
N2 C21 1.443(2) . ? 
N2 C27 1.517(2) . ? 
N3 C31 1.438(2) . ? 
N3 C37 1.511(2) . ? 
N4 C41 1.303(2) . ? 
S5 C51 1.771(2) . ? 
S5 C41 1.790(2) . ? 
C11 C16 1.392(3) . ? 
C11 C12 1.399(3) . ? 
C12 C13 1.396(3) . ? 
C13 C14 1.391(3) . ? 
C13 C131 1.510(3) . ? 
C14 C15 1.389(3) . ? 
C15 C16 1.397(3) . ? 
C15 C151 1.505(3) . ? 
C17 C110 1.528(3) . ? 
C17 C19 1.531(3) . ? 
C17 C18 1.532(3) . ? 
C21 C26 1.392(3) . ? 
C21 C22 1.396(3) . ? 
C22 C23 1.392(3) . ? 
C23 C24 1.389(4) . ? 
C23 C231 1.512(3) . ? 
C24 C25 1.394(4) . ? 
C25 C26 1.396(3) . ? 
C25 C251 1.519(4) . ? 
C27 C210 1.532(3) . ? 
C27 C29 1.532(3) . ? 
C27 C28 1.535(3) . ? 
C31 C32 1.397(3) . ? 
C31 C36 1.404(3) . ? 
C32 C33 1.398(3) . ? 
C33 C34 1.392(3) . ? 
C33 C331 1.513(3) . ? 
C34 C35 1.394(3) . ? 
C35 C36 1.396(3) . ? 
C35 C351 1.512(3) . ? 
C37 C39 1.528(3) . ? 
C37 C310 1.537(3) . ? 
C37 C38 1.541(3) . ? 
C41 C42 1.470(3) . ? 
C42 C47 1.396(3) . ? 
C42 C43 1.405(3) . ? 
C43 C44 1.390(3) . ? 
C44 C45 1.376(4) . ? 
C45 C46 1.391(4) . ? 
C46 C47 1.389(3) . ? 
C51 C56 1.388(3) . ? 
C51 C52 1.394(3) . ? 
C52 F521 1.343(3) . ? 
C52 C53 1.381(3) . ? 
C53 F531 1.346(3) . ? 
C53 C54 1.373(4) . ? 
C54 F541 1.342(2) . ? 
C54 C55 1.378(3) . ? 
C55 F551 1.342(3) . ? 
C55 C56 1.384(3) . ? 
C56 F561 1.345(2) . ? 
  
loop_ 
 _geom_angle_atom_site_label_1 
 _geom_angle_atom_site_label_2 
 _geom_angle_atom_site_label_3 
 _geom_angle 
 _geom_angle_site_symmetry_1 
 _geom_angle_site_symmetry_3 
 _geom_angle_publ_flag 
N4 Mo1 N2 100.84(7) . . ? 
N4 Mo1 N1 102.74(7) . . ? 
N2 Mo1 N1 110.91(7) . . ? 
N4 Mo1 N3 106.05(7) . . ? 
N2 Mo1 N3 114.09(7) . . ? 
N1 Mo1 N3 119.56(7) . . ? 
C11 N1 C17 117.16(15) . . ? 
C11 N1 Mo1 109.39(11) . . ? 
C17 N1 Mo1 131.43(13) . . ? 
C21 N2 C27 113.73(15) . . ? 
C21 N2 Mo1 120.16(12) . . ? 
C27 N2 Mo1 125.98(12) . . ? 
C31 N3 C37 116.19(14) . . ? 
C31 N3 Mo1 115.75(12) . . ? 
C37 N3 Mo1 126.92(12) . . ? 
C41 N4 Mo1 162.03(14) . . ? 
C51 S5 C41 102.68(9) . . ? 
C16 C11 C12 118.32(18) . . ? 
C16 C11 N1 119.61(17) . . ? 
C12 C11 N1 121.97(18) . . ? 
C13 C12 C11 121.21(19) . . ? 
C14 C13 C12 118.70(19) . . ? 
C14 C13 C131 120.27(19) . . ? 
C12 C13 C131 121.0(2) . . ? 
C15 C14 C13 121.65(19) . . ? 
C14 C15 C16 118.3(2) . . ? 
C14 C15 C151 121.0(2) . . ? 
C16 C15 C151 120.7(2) . . ? 
C11 C16 C15 121.71(19) . . ? 
N1 C17 C110 108.70(16) . . ? 
N1 C17 C19 110.28(17) . . ? 
C110 C17 C19 107.79(18) . . ? 
N1 C17 C18 111.04(17) . . ? 
C110 C17 C18 109.28(18) . . ? 
C19 C17 C18 109.68(19) . . ? 
C26 C21 C22 119.31(19) . . ? 
C26 C21 N2 120.85(18) . . ? 
C22 C21 N2 119.82(19) . . ? 
C23 C22 C21 120.7(2) . . ? 
C24 C23 C22 118.9(2) . . ? 
C24 C23 C231 121.7(2) . . ? 
C22 C23 C231 119.4(2) . . ? 
C23 C24 C25 121.6(2) . . ? 
C24 C25 C26 118.5(2) . . ? 
C24 C25 C251 121.2(2) . . ? 
C26 C25 C251 120.3(2) . . ? 
C21 C26 C25 120.9(2) . . ? 
N2 C27 C210 108.80(15) . . ? 
N2 C27 C29 109.93(15) . . ? 
C210 C27 C29 108.77(16) . . ? 
N2 C27 C28 111.21(15) . . ? 
C210 C27 C28 109.24(16) . . ? 
C29 C27 C28 108.86(16) . . ? 
C32 C31 C36 118.66(18) . . ? 
C32 C31 N3 119.66(17) . . ? 
C36 C31 N3 121.67(18) . . ? 
C31 C32 C33 121.12(19) . . ? 
C34 C33 C32 119.0(2) . . ? 
C34 C33 C331 120.9(2) . . ? 
C32 C33 C331 120.1(2) . . ? 
C33 C34 C35 121.3(2) . . ? 
C34 C35 C36 118.94(19) . . ? 
C34 C35 C351 120.3(2) . . ? 
C36 C35 C351 120.8(2) . . ? 
C35 C36 C31 121.02(19) . . ? 
N3 C37 C39 108.17(15) . . ? 
N3 C37 C310 110.52(16) . . ? 
C39 C37 C310 108.20(16) . . ? 
N3 C37 C38 110.92(16) . . ? 
C39 C37 C38 109.49(16) . . ? 
C310 C37 C38 109.48(16) . . ? 
N4 C41 C42 123.28(18) . . ? 
N4 C41 S5 117.88(14) . . ? 
C42 C41 S5 118.80(14) . . ? 
C47 C42 C43 118.55(19) . . ? 
C47 C42 C41 119.62(18) . . ? 
C43 C42 C41 121.83(19) . . ? 
C44 C43 C42 120.2(2) . . ? 
C45 C44 C43 120.7(2) . . ? 
C44 C45 C46 119.6(2) . . ? 
C47 C46 C45 120.3(2) . . ? 
C46 C47 C42 120.5(2) . . ? 
C56 C51 C52 116.14(19) . . ? 
C56 C51 S5 125.34(16) . . ? 
C52 C51 S5 118.50(16) . . ? 
F521 C52 C53 118.13(19) . . ? 
F521 C52 C51 119.65(19) . . ? 
C53 C52 C51 122.2(2) . . ? 
F531 C53 C54 119.8(2) . . ? 
F531 C53 C52 120.1(2) . . ? 
C54 C53 C52 120.1(2) . . ? 
F541 C54 C53 120.4(2) . . ? 
F541 C54 C55 120.3(2) . . ? 
C53 C54 C55 119.4(2) . . ? 
F551 C55 C54 119.8(2) . . ? 
F551 C55 C56 120.3(2) . . ? 
C54 C55 C56 119.9(2) . . ? 
F561 C56 C55 117.6(2) . . ? 
F561 C56 C51 120.22(18) . . ? 
C55 C56 C51 122.2(2) . . ? 
  
_diffrn_measured_fraction_theta_max    0.999 
_diffrn_reflns_theta_full              28.28 
_diffrn_measured_fraction_theta_full   0.999 
_refine_diff_density_max    0.894 
_refine_diff_density_min   -0.326 
_refine_diff_density_rms    0.081 
